1 **miniTurbo-based interactomics of two plasma**  
2 **membrane-localized SNARE proteins in**  
3 ***Marchantia polymorpha***

4 Katharina Melkonian<sup>1</sup>, Sara Christina Stolze<sup>2</sup>, Anne Harzen<sup>1,2</sup>  
5 and Hirofumi Nakagami<sup>1,2\*</sup>

6

7 <sup>1</sup>Basic Immune System of Plants, Max-Planck Institute for  
8 Plant Breeding Research, Carl-von-Linné-Weg 10, 50829  
9 Cologne, Germany

10 <sup>2</sup>Protein Mass Spectrometry, Max-Planck Institute for Plant  
11 Breeding Research, Carl-von-Linné-Weg 10, 50829 Cologne,  
12 Germany

13

14

15 **\*Corresponding author:**

16 e-mail: nakagami@mpipz.mpg.de

17 Telephone: +49-221-5062-224

18 Fax: +49-221-5062-353

19

20

21 Total word count: 6769

22 Introduction: 1195

23 Materials and Methods: 2995

24 Results: 1451

25 Discussion: 1128

26 Acknowledgements: 42

27 Number of figures: 4

28 Coloured figures: 4

29 Tables: 1

30 Supporting information: 6 figures, 4 data tables

31

32

33

34 **Summary**

35

- 36 • *Marchantia polymorpha* is a model liverwort and its  
37 overall low genetic redundancy is advantageous for  
38 dissecting complex pathways. Proximity-dependent *in*  
39 *vivo* biotin-labelling methods have emerged as powerful  
40 interactomics tools in recent years. However,  
41 interactomics studies applying proximity labelling are  
42 currently limited to angiosperm species in plants.
- 43 • Here, we established and evaluated a miniTurbo-based  
44 interactomics method in *M. polymorpha* using  
45 MpSYP12A and MpSYP13B, two plasma membrane-  
46 localized SNARE proteins, as baits.
- 47 • We show that our method yields a manifold of potential  
48 interactors of MpSYP12A and MpSYP13B compared to  
49 a co-immunoprecipitation approach. Our method could  
50 capture specific candidates for each SNARE.
- 51 • We conclude that a miniTurbo-based method is a  
52 feasible tool for interactomics in *M. polymorpha* and  
53 potentially applicable to other model bryophytes. Our  
54 interactome dataset on MpSYP12A and MpSYP13B  
55 will be a useful resource to elucidate the evolution of  
56 SNARE functions.

57

58 **Keywords:** *interactomics, Marchantia polymorpha,*  
59 *membrane-trafficking, miniTurbo, proximity labelling, SNARE*  
60 *protein*

61

62

## 63 **Introduction**

64           The liverwort *Marchantia polymorpha* is a well-  
65 established model plant. The *M. polymorpha* genome has been  
66 sequenced (Bowman *et al.*, 2017); (Montgomery *et al.*, 2020)  
67 and genetic tools have been developed (Ishizaki *et al.*, 2008;  
68 Ishizaki *et al.*, 2013; Kubota *et al.*, 2013; Ishizaki *et al.*, 2015).  
69 In *M. polymorpha*, there is no evidence for whole genome  
70 duplication during evolution and the number of paralogs for  
71 many regulatory genes is rather low in comparison to other  
72 model plants (Bowman *et al.*, 2017). Accordingly, low genetic  
73 redundancy is a useful feature of *M. polymorpha* in dissecting  
74 basic mechanisms and gene functions underlying complex  
75 pathways.

76           Elucidating complex pathways and protein-interaction  
77 networks remain major challenges in plant research.  
78 Conventional approaches to study protein-protein interactions,  
79 like co-immunoprecipitation (Co-IP) followed by mass  
80 spectrometry (MS) have limitations. Successful enrichment and  
81 purification under non-physiological conditions require a  
82 certain binding affinity between interactors. Therefore, Co-IP is  
83 often effective to capture stable complexes, while weak and  
84 transient associations can easily be lost. The analysis of  
85 interactions between members of subcellular proteomes may  
86 require an enrichment of cellular compartments before Co-IP to  
87 avoid artificial interactions upon cell lysis. In this context,  
88 proximity-dependent *in vivo* labelling (PL) approaches are  
89 gaining an increasing importance as alternative interactomics  
90 approaches.

91           The miniTurbo-based PL method was initially  
92 established in bacterial and mammalian cells, and is based on  
93 biotin ligase-mediated labelling of interaction partners with  
94 exogenously applied biotin (Branon *et al.*, 2018). TurboID is a  
95 promiscuous biotin ligase that has been engineered from *E. coli*

96 BirA with 15 mutations and has a higher ligase activity at a  
97 wide range of temperatures compared to BirA. The miniTurbo  
98 is a smaller version of TurboID with a deleted N-terminal  
99 domain and has 13 mutations compared to BirA. TurboID and  
100 miniTurbo were reported to have higher activities than other  
101 biotin-ligases, namely BioID, BioID2, and BASU, in HEK  
102 293T cells. Compared to TurboID, miniTurbo was found to be  
103 overall 1.5 times less active and showed a lower background  
104 labelling activity without exogenous application of biotin in  
105 HEK 293T cells (Branon *et al.*, 2018). For PL of interaction  
106 partners, the biotin ligase is genetically fused to a bait.  
107 Molecules in proximity of the bait are biotinylated by the ligase  
108 in the presence of biotin. After labelling, biotinylated proteins  
109 can be extracted and enriched by streptavidin-pulldown before  
110 an identification by MS.

111 For pulldown of biotinylated proteins, it is not required  
112 that proteins and complexes remain in their native state.  
113 Because enrichment of biotinylated proteins does not rely on  
114 affinity to the bait proteins. PL approaches can thus also  
115 capture weak or transient interactions. The binding affinity  
116 between biotin and streptavidin is high. Therefore, protein  
117 extraction, binding, and washing steps can be conducted in the  
118 presence of high concentrations of detergents. The ligase  
119 activity can be inactivated during protein extraction, and thus  
120 artificial labelling upon cell lysis will not occur. This is  
121 advantageous for investigating interactions of proteins in  
122 subcellular compartments, including plasma membrane-  
123 localized proteins.

124 Since biotin ligases do not distinguish between real  
125 interaction partners and other molecules residing in proximity  
126 of the bait by chance, a certain level of unspecific labelling is  
127 expected. Unspecific labelling may occur according to an  
128 expression of the bait in a specific cellular compartment, cell-  
129 type, tissue, organ, at a specific developmental stage, or

130 physiological status and will be enhanced under saturating  
131 labelling conditions. Therefore, non-saturating labelling  
132 conditions are desirable and appropriate controls should be  
133 designed to narrow down candidates of high confidence by  
134 minimizing false positive identifications (Mair *et al.*, 2019).

135 Plants, unlike animals, can synthesise biotin *de novo*  
136 (Baldet *et al.*, 1993; Baldet *et al.*, 1997). High levels of  
137 endogenous biotin may lead to background labelling,  
138 potentially interfering with PL approaches. The endogenous  
139 biotin level in *M. polymorpha* has not been investigated. In *A.*  
140 *thaliana*, the sucrose-H<sup>+</sup> symporter AtSUC5 was identified to  
141 mediate uptake of exogenous biotin (Ludwig *et al.*, 2000;  
142 Pommerrenig *et al.*, 2013). Until to date, AtSUC5 remains the  
143 only sucrose transporter that was shown to function in biotin  
144 uptake *in planta*. It is not yet known whether comparable  
145 mechanisms for biotin uptake exist in *M. polymorpha*.

146 The TurboID or miniTurbo method has been  
147 successfully applied in *A. thaliana*, *Nicotiana benthamiana*,  
148 and *Solanum lycopersicum* using stable transgenic lines or  
149 transient expression systems, to efficiently label and identify  
150 subcellular proteomes in specific cell types (Mair *et al.*, 2019)  
151 as well as interacting partners of cytosolic (Zhang *et al.*, 2019;  
152 Arora *et al.*, 2020) and nuclear (Mair *et al.*, 2019) bait proteins  
153 by MS. Arora *et al.* (2020) demonstrated that TurboID can be  
154 applied to detect known interactions of plasma membrane-  
155 localized proteins with a targeted approach using  
156 immunoblotting. A direct comparison of interactomics applying  
157 Co-IP and PL using the same plant materials is still missing. It  
158 remains unclear whether biotin ligase-mediated PL approaches  
159 can be sensitive and specific to reveal differences in  
160 interactomes of very similar proteins, like closely related  
161 homologs. Lastly, in bryophyte species, an interactome study  
162 utilizing PL approaches has not yet been reported.

163           In *M. polymorpha*, the two SNARE (soluble N-  
164 ethylmaleimide-sensitive factor attachment protein receptor)  
165 proteins, MpSYP12A and MpSYP13B, are plasma membrane-  
166 localized and ubiquitously expressed throughout the thallus  
167 (Kanazawa *et al.*, 2016; Kanazawa *et al.*, 2020). Plant SNAREs  
168 modulate membrane-trafficking, intra- and intercellular  
169 signalling, and transport. In *A. thaliana*, 65 SNARE proteins  
170 have been identified, 9 of which are SYP1 family proteins that  
171 are plasma membrane-localized (Uemura *et al.*, 2004). During  
172 land plant evolution, the expansion of SNARE proteins and  
173 their functional diversification was hypothesized to be linked to  
174 multicellularity and likely facilitated the adaptation to a  
175 terrestrial lifestyle (Sanderfoot, 2007). Thus, land plant  
176 secretory pathways are highly sophisticated, dynamic, and  
177 diversely regulated, being involved in a manifold of cellular  
178 processes ranging from polarized growth to defence responses  
179 (Batoko & Moore, 2001; Collins *et al.*, 2003; Catalano *et al.*,  
180 2007; Enami *et al.*, 2009; Silva *et al.*, 2010; Reichardt *et al.*,  
181 2011; Uemura *et al.*, 2012; Ichikawa *et al.*, 2014; Johansson *et al.*,  
182 2014; Yun *et al.*, 2016; Xia *et al.*, 2019; Hirano *et al.*, 2020;  
183 Rubiato *et al.*, 2021). In *M. polymorpha*, the SYP1 protein  
184 family is comprised of 4 members: SYP12A, SYP12B,  
185 SYP13A, and SYP13B. MpSYP13A and MpSYP13B belong to  
186 the SYP13 group and are closely related to AtSYP131 and  
187 AtSYP132. MpSYP12A and MpSYP12B belong to the  
188 SYP11/12 group, which is phylogenetically separated from the  
189 SYP11 or SYP12 group proteins in angiosperms (Kanazawa *et al.*  
190 *et al.*, 2016; Bowman *et al.*, 2017). Carella *et al.* (2018) reported  
191 that MpSYP13B accumulated in haustoria-like structures upon  
192 infection of *M. polymorpha* with the oomycete pathogen  
193 *Phytophthora palmivora*. Recently, MpSYP12A was shown to  
194 localize to the phragmoplast during cell plate formation  
195 (Kanazawa *et al.*, 2020). Interaction partners of SYP1 family  
196 proteins in *M. polymorpha* have not yet been identified.

197           In this study, we established a miniTurbo-based PL  
198 method for interactome profiling in *M. polymorpha*. Using  
199 MpSYP12A and MpSYP13B as baits, we evaluated biotin-  
200 labelling conditions and a procedure to enrich biotinylated  
201 proteins, and then potential interactors were identified by MS.  
202 We directly compared the performances of Co-IP and PL  
203 approaches using the same plant materials. Lastly, by  
204 comparing the identified interactomes of MpSYP12A and  
205 MpSYP13B, we found potential interactors that are specific to  
206 each SNARE.  
207  
208

## 209 **Materials and Methods**

210 **Construction and cloning.** Gateway entry vectors containing  
211 genomic sequences for an expression of MpSYP12A and  
212 MpSYP13B under their own regulatory elements (5'- and 3'-  
213 flanking sequences and introns) in *M. polymorpha* were  
214 provided by Takashi Ueda (Kanazawa *et al.*, 2016). For N-  
215 terminal tagging of MpSYP12A and MpSYP13B with  
216 miniTurbo and Myc-tag, entry vector backbones were  
217 linearized by restriction with SmaI or BamHI enzymes,  
218 respectively. Codon-optimized miniTurbo (Fig. S1) was  
219 synthesized by Thermo GeneArt and PCR-amplified from a  
220 donor plasmid. Gateway entry vectors pMKMM20 (3.5 kb  
221 upstream *SYP13B*:5'UTR:*miniTurbo-Myc-SYP13B*:3'UTR)  
222 and pMKMM21 (3.5 kb upstream *SYP12A*:5'UTR:*miniTurbo-*  
223 *Myc-SYP12A*:3'UTR) were generated by in-fusion cloning (HD  
224 enzyme mix; Takara Bio). Gateway binary vectors pMKMM22  
225 and pMKMM23 for the expression of miniTurbo-Myc-  
226 MpSYP13B and miniTurbo-Myc-MpSYP12A were generated  
227 by LR-recombination (LR clonase; Invitrogen) of pMKMM20  
228 or pMKMM21 with pMpGWB301 (Fig. S2).

229 ***M. polymorpha* lines used in this study.** The male *M.*  
230 *polymorpha* Tak-1 ecotype was used as a wildtype. Transgenic  
231 lines in Tak-1 background were generated using the cut thallus  
232 method (Kubota *et al.*, 2013) and *Agrobacterium* strain  
233 GV3101 carrying pMKMM22 or pMKMM23. Transformants  
234 were selected using Chlorsulfuron and Cefotaxime antibiotics  
235 for two generations. Selected transformants were screened for  
236 an expression of miniTurbo-Myc-MpSYP12A and miniTurbo-  
237 Myc-MpSYP13B fusion-proteins by immunoblotting.  
238 Transgenic lines were chosen that displayed similar expression  
239 levels of miniTurbo-Myc-MpSYP12A and miniTurbo-Myc-  
240 MpSYP13B for further analyses (Fig. S3a). *M. polymorpha*



241 plants were grown and maintained on Gamborg's B5 (Duchefa;  
242 G0209) half strength solid medium containing 1 % plant agar in  
243 a walk-in growth chamber under constant white light (50–60  
244  $\mu\text{mol photons LED m}^{-2} \text{ s}^{-1}$ ) at 22–24 °C.

245 **Sample preparation for PL and Co-IP experiments.** *M.*  
246 *polymorpha* Tak-1 and transgenic lines were grown from single  
247 gemmae on Gamborg's B5 half strength solid medium  
248 containing 0.8 % plant agar for 10 days under constant white  
249 light (50–60  $\mu\text{mol photons LED m}^{-2} \text{ s}^{-1}$ ) at 22–24 °C. Ten  
250 individual 10-day old thalli were pooled per sample. For Co-IP,  
251 untreated thalli were sampled immediately and frozen in liquid  
252 nitrogen until further processing. For biotin treatment, thalli  
253 were transferred into transparent 6- or 12-well plates (Greiner  
254 Bio-One; 657160) and submerged in 0–700  $\mu\text{M}$  biotin (Sigma;  
255 B4501) solution in water. The thalli were vacuum-infiltrated  
256 with biotin solutions for 5 minutes using a desiccator and the  
257 samples were incubated for 0–24 hours at room temperature  
258 (RT; 22–25 °C) while shaking. After incubation, the thalli were  
259 washed once with ice-cold ultrapure water for 2 minutes to  
260 remove excess biotin. For sampling, thalli were transferred onto  
261 filter paper (Whatman; 1001-085) and left for 10 seconds to  
262 drain off excess liquid. Next, the thalli were pressed onto the  
263 filter paper for 5 seconds, immediately transferred to fresh  
264 tubes containing 2 stainless-steel beads and snap-frozen in  
265 liquid nitrogen. The plant material was ground in liquid  
266 nitrogen using a mixing mill (MM400, Retsch) for 5 minutes at  
267 30 Hz. For Co-IP, all following steps were conducted at 4 °C.  
268 The finely ground powder was mixed with extraction buffer (50  
269 mM Tris pH 7.5, 150 mM NaCl, 10 % glycerol, 2 mM  
270 ethylenediaminetetraacetic acid (EDTA), 5 mM dithiothreitol  
271 (DTT), 1 % Triton X-100, 1 % Plant Protease Inhibitor; Sigma  
272 P9599) and incubated for 30 minutes for protein extraction. For  
273 PL samples, the powder was mixed with 500  $\mu\text{l}$  pre-heated

274 SDT buffer (100 mM Tris pH 7.5, 4 % sodium dodecyl sulfate  
275 (SDS), 0.1 M DTT) at 95 °C for 5 minutes and then sonicated  
276 for 10 minutes. Cell debris was removed from the extracts by  
277 two consecutive centrifugation steps (10,000 g, 10 minutes).  
278 The protein concentration in cell extracts for Co-IP and PL was  
279 determined using the Pierce 660 nm Assay (Thermo Fisher;  
280 22660). Cell extracts with 500 µg of total protein were used as  
281 input for Myc-Trap Co-IP and biotin depletion before affinity-  
282 pulldown of biotinylated proteins. For biotin-treated thalli, an  
283 aliquot of each sample was taken for immunoblotting and  
284 whole proteome analysis. Remaining samples were subjected to  
285 biotin depletion before pulldown using streptavidin. Biotin  
286 dilution series and time course experiments were each done in  
287 two independent experiments (Fig. 1c, d; Fig. S4a, b).

288

289 **Co-IP.** Myc-Trap beads (Chromotek; ytma-20) were  
290 equilibrated in ice-cold wash buffer (50 mM Tris pH 7.5, 150  
291 mM NaCl, 10 % glycerol, 2 mM EDTA) according to the  
292 manufacturer's instructions. Cell extracts with 500 µg of total  
293 protein in 1 ml volume were mixed with 25 µl of equilibrated  
294 Myc-Trap beads and pulldown was performed for 2 hours at  
295 4 °C on a rolling wheel. Myc-Trap beads were magnetically  
296 separated from the supernatant and washed 3 times in 500 µl  
297 wash buffer. An aliquot corresponding to 10 % of the beads  
298 was used for immunoblotting and the remaining beads were  
299 subjected to on-bead digestion with trypsin. For  
300 immunoblotting of Co-IP samples, the proteins were eluted  
301 from the beads in 30 µl 4x SDS sample buffer (250 mM Tris-  
302 HCl pH 6.8, 40 % glycerol, 8 % SDS, 0.08 % bromophenol  
303 blue, 200 mM DTT) by boiling for 10 minutes at 95 °C.

304

305 **Depletion of free biotin.** Biotin depletion methods were tested  
306 using a transgenic line expressing miniTurbo-Myc-MpSYP13B  
307 and Tak-1. Cell extracts were prepared as described above from

308 10-day-old thalli treated with 700  $\mu$ M biotin for 24 hours. As  
309 input, 500  $\mu$ g of total protein in 500  $\mu$ l SDT buffer (100 mM  
310 Tris pH 7.5, 4 % SDS, 0.1 M DTT) was used per sample. For  
311 methanol:chloroform precipitation, 666  $\mu$ l methanol and 166  $\mu$ l  
312 chloroform were added to the cell extracts and the samples  
313 were mixed. Next, 300  $\mu$ l water was further added and mixed,  
314 and then centrifuged for 10 minutes at 4,000 rpm. The  
315 separated upper and lower liquid phases were removed. The  
316 solid white layer containing precipitated proteins that had  
317 formed between the liquid phases was kept. The protein pellet  
318 was resuspended in 600  $\mu$ l methanol and sonicated for 10  
319 minutes. After centrifugation for 10 minutes at 13,000 rpm, the  
320 supernatant was removed completely. The protein pellets were  
321 air-dried for 5 minutes and resuspended in 500  $\mu$ l SDT buffer.  
322 After 10 minutes sonication, the samples were incubated for 30  
323 minutes at RT while shaking at 1,000 rpm, until the protein  
324 pellets were redissolved. The samples were then diluted with  
325 PBS buffer (0.1 M phosphate, 0.15 M NaCl, pH 7.2) to a final  
326 concentration of 0.5 % SDS. For biotin depletion with PD-10  
327 desalting columns (VWR; 17085101), the columns were  
328 equilibrated with SDT:water (1:5) and the cell extracts were  
329 diluted to 2.5 ml with ultrapure water. PD-10 desalting was  
330 performed according to the manufacturer's instructions and the  
331 proteins were eluted with 3.5 ml PBS buffer containing 0.5 %  
332 SDS. For biotin depletion using Zeba spin columns (Thermo;  
333 89893), the columns were equilibrated with SDT:water (1:5)  
334 and the cell extracts were diluted to 2.5 ml with ultrapure water.  
335 Desalting was then performed according to the manufacturer's  
336 instructions. All biotin-depleted samples were adjusted to 4 ml  
337 final volume with binding buffer (0.1 M phosphate, 0.15 M  
338 NaCl, 0.5 % SDS, pH 7.2) before pulldown. Aliquots of  
339 intermediate steps were taken for immunoblotting. All biotin  
340 depletion methods were tested at the same time in duplicates.

341 PD-10 column desalting method was employed for the pulled-  
342 down samples measured by MS.

343

344 **Pulldown of biotinylated proteins.** Biotinylated proteins were  
345 pulled-down using streptavidin-agarose beads (Thermo; 20353).  
346 Per sample, 100  $\mu$ l of a 50 % slurry were used. The beads were  
347 washed and equilibrated in the binding buffer. Next, the biotin-  
348 depleted samples were added to the beads and pulldown was  
349 performed overnight at 22–25 °C while mixing. The beads  
350 were washed once with 6 ml PBS buffer containing 2 % SDS  
351 and then 3 times with 10 ml PBS buffer. Aliquots of all  
352 samples were taken during intermediate steps and an aliquot  
353 corresponding to 10 % of the washed beads was taken after  
354 pulldown for immunoblotting. The proteins were eluted from  
355 the beads by boiling for 10 minutes at 95 °C in 50  $\mu$ l 4x SDS  
356 sample buffer containing 20 mM biotin while shaking at 1,000  
357 rpm. For immunoblots, 20 % of the IP-eluate was used,  
358 corresponding to 2 % of the input bead-amount. The remaining  
359 beads from pulldown with bound biotinylated proteins were  
360 subjected to on-bead digestion for MS analysis.

361

362 **On-bead digestion.** For Myc-IP and streptavidin-pulldown  
363 samples, Myc-Trap beads or streptavidin-agarose beads were  
364 resuspended in 25  $\mu$ l digest buffer 1 (50 mM Tris pH 7.5, 2 M  
365 urea, 1 mM DTT, 5  $\mu$ g  $\mu$ l<sup>-1</sup> trypsin) and incubated at 30 °C for  
366 30 minutes while shaking at 400 rpm. The supernatant was  
367 separated from the beads magnetically or by sedimentation and  
368 transferred to a fresh tube. The beads were then mixed with 50  
369  $\mu$ l digest buffer 2 (50 mM Tris pH 7.5, 2 M Urea, 5 mM CAA),  
370 and the supernatant was separated from the beads and  
371 combined with the supernatant from the previous step. The  
372 combined supernatant was further incubated overnight at 32 °C  
373 while shaking at 400 rpm. Trypsin was inactivated by  
374 acidification with trifluoroacetic acid (TFA), and the peptide

375 sample was subsequently desalted using C<sub>18</sub> stage tips  
376 (Rappsilber *et al.* (2003).

377

378 **Sample preparation for whole proteome analyses.** Aliquots  
379 of cell extracts from biotin-labelling experiments were used for  
380 whole proteome analysis. The extracts were processed using a  
381 filter-aided sample preparation (FASP) protocol adapted from  
382 Wisniewski *et al.* (2009). In brief, 50 µg of total protein extract  
383 were used as input. The proteins were alkylated using  
384 chloroacetamide and digested using LysC and trypsin. The  
385 peptide solutions were desalted using C<sub>18</sub> stage tips. Whole  
386 proteome analyses were conducted for one representative  
387 replicate per genotype and condition.

388

389 **LC-MS/MS data acquisition.** The dried peptides from filter-  
390 aided digestion were re-dissolved in buffer A (2 % ACN, 0.1 %  
391 TFA) and adjusted to a final peptide concentration of 0.1 µg µl<sup>-1</sup>  
392 for analysis. The peptide samples from streptavidin- and Myc-  
393 Trap pulldowns were dissolved in 10 µl buffer A and measured  
394 without dilution.

395 PL samples were analysed using an EASY-nLC 1200  
396 (Thermo Fisher) coupled to a Q Exactive Plus mass  
397 spectrometer (Thermo Fisher). The peptides were separated on  
398 16 cm frit-less silica emitters (New Objective, 75 µm inner  
399 diameter), packed in-house with reversed-phase ReproSil-Pur  
400 C18 AQ 1.9 µm resin (Dr. Maisch). The peptides were loaded  
401 on the column and eluted for 50 minutes using a segmented  
402 linear gradient of 5 % to 95 % solvent B (0 minutes: 5 % B;  
403 0–5 minutes -> 5 % B; 5–25 minutes -> 20 % B; 25–35  
404 minutes -> 35 % B; 35–40 minutes -> 95 % B; 40–50 minutes -  
405 > 95 % B) (solvent A: 0 % ACN, 0.1 % FA; solvent B: 80 %  
406 ACN, 0.1 % FA) at a flow rate of 300 nl per minute. Mass  
407 spectra were acquired in data-dependent acquisition mode with  
408 a TOP10 method. MS spectra were acquired in the Orbitrap

409 analyser with a mass range of 300–1500 m/z at a resolution of  
410 70,000 FWHM and a target value of  $3 \times 10^6$  ions. Precursors  
411 were selected with an isolation window of 1.3 m/z. HCD  
412 fragmentation was performed at a normalized collision energy  
413 of 25. MS/MS spectra were acquired with a target value of  
414  $5 \times 10^5$  ions at a resolution of 17,500 FWHM, a maximum  
415 injection time of 85 milliseconds and a fixed first mass of m/z  
416 100. Peptides with a charge of 1, greater than 6, or with  
417 unassigned charge state were excluded from fragmentation for  
418 MS<sup>2</sup>, dynamic exclusion for 20 seconds prevented repeated  
419 selection of precursors.

420 Myc-IP and whole proteome samples were analysed  
421 using an EASY-nLC 1000 (Thermo Fisher) coupled to a Q  
422 Exactive mass spectrometer (Thermo Fisher). The peptides  
423 were separated on 16 cm frit-less silica emitters (New  
424 Objective, 75  $\mu$ m inner diameter), packed in-house with  
425 reversed-phase ReproSil-Pur C18 AQ 1.9  $\mu$ m resin (Dr.  
426 Maisch). Peptides (0.5  $\mu$ g) were loaded on the column and  
427 eluted for 115 minutes using a segmented linear gradient of 5  
428 % to 95 % solvent B (0 minutes: 5 % B; 0–5 minutes -> 5 % B;  
429 5–65 minutes -> 20 % B; 65–90 minutes -> 35 % B; 90–100  
430 minutes -> 55 % B; 100–105 minutes -> 95 % B, 105–115  
431 minutes -> 95 % B) (solvent A: 0 % ACN, 0.1 % FA; solvent  
432 B: 80 % ACN, 0.1 % FA) at a flow rate of 300 nl per minute.  
433 Mass spectra were acquired in data-dependent acquisition mode  
434 with a TOP15 method. MS spectra were acquired in the  
435 Orbitrap analyser with a mass range of 300–1750 m/z at a  
436 resolution of 70,000 FWHM and a target value of  $3 \times 10^6$  ions.  
437 Precursors were selected with an isolation window of 2.0 m/z.  
438 HCD fragmentation was performed at a normalized collision  
439 energy of 25. MS/MS spectra were acquired with a target value  
440 of  $10^5$  ions at a resolution of 17,500 FWHM, a maximum  
441 injection time of 55 milliseconds and a fixed first mass of m/z  
442 100. Peptides with a charge of 1, greater than 6, or with

443 unassigned charge state were excluded from fragmentation for  
444 MS<sup>2</sup>, dynamic exclusion for 30 seconds prevented repeated  
445 selection of precursors.

446

447 **Data analysis.** Raw data were processed using MaxQuant  
448 software (version 1.6.3.4, <http://www.maxquant.org/>) (Cox &  
449 Mann, 2008) with label-free quantification (LFQ) and intensity  
450 based absolute quantification (iBAQ) enabled (Tyanova *et al.*,  
451 2016). For PL data, normalization was skipped for the LFQ  
452 quantification. MS/MS spectra were searched by the  
453 Andromeda search engine against a combined database  
454 containing the sequences from *M. polymorpha*  
455 (MpTak1v5.1\_r1\_primary\_transcripts\_proteinV2;  
456 <http://marchantia.info/>, (Montgomery *et al.*, 2020)) and  
457 sequences of 248 common contaminant proteins and decoy  
458 sequences and the sequence of miniTurbo. Trypsin specificity  
459 was required and a maximum of 2 missed cleavages allowed.  
460 Minimal peptide length was set to 7 amino acids.  
461 Carbamidomethylation of cysteine residues was set as fixed,  
462 oxidation of methionine and protein N-terminal acetylation as  
463 variable modifications. Peptide-spectrum-matches and proteins  
464 were retained if below a false discovery rate (FDR) of 1 %. For  
465 PL data, the non-normalized MaxLFQ values of all replicates  
466 (4 per condition) were pre-processed in Perseus (version 1.5.8.5,  
467 <http://www.maxquant.org/>) and submitted for normalization  
468 analysis using the Normalyzer tool  
469 (<http://normalyzer.immunoprot.lth.se/>, (Chawade *et al.*, 2014)).  
470 The output was analysed for outliers and 1 replicate per  
471 condition was removed. The final data analysis was conducted  
472 in MaxQuant as described above on the reduced raw dataset.  
473 Statistical analysis of the MaxLFQ values was conducted using  
474 Perseus (version 1.5.8.5, <http://www.maxquant.org/>).  
475 Quantified proteins were filtered for reverse hits and hits  
476 “identified by site” and MaxLFQ values were log<sub>2</sub> transformed.

477 For PL data, transformed MaxLFQ values were normalized by  
478 subtraction of the median per column. After grouping samples  
479 by condition only those proteins were retained for subsequent  
480 analysis that had 3 or 2 valid values in one of the conditions for  
481 PL data or Myc-IP data, respectively. Two-sample *t*-tests were  
482 performed using a permutation-based FDR of 5 %. For the  
483 generation of volcano plots, missing values were imputed from  
484 a normal distribution using the default settings in Perseus (1.8  
485 downshift, separately for each column) for data with 3 valid  
486 values in one of the conditions. Volcano plots were generated  
487 in Perseus using an FDR of 5 % and an  $S0 = 1$ . The Perseus  
488 output was exported and further processed using Microsoft  
489 Excel and RStudio (version 1.4.1103,  
490 <https://www.rstudio.com/>), based on R (version x64 4.0.3,  
491 <https://cran.r-project.org/>). The data was processed in RStudio  
492 using tidyverse (version 1.3.0), rio (version 0.5.16) and zoo  
493 (version 1.8-8) packages. Relative iBAQ values were  
494 calculated per column from MaxQuant output, scaled by factor  
495  $10^6$  and log<sub>10</sub> transformed. The median value of 3 replicates  
496 per condition was used to generate volcano plots including  
497 relative iBAQ values. Volcano pots were generated in RStudio  
498 using the ggplot2 (version 3.3.3), ggrepel (version 0.9.1) and  
499 ggsci (version 2.9) packages.

500

501 **Immunoblotting.** Proteins were separated by SDS-  
502 polyacrylamide-gel electrophoresis (PAGE) and blotted onto  
503 PVDF membranes (BioRad; 1704272) using a Trans-Blot  
504 Turbo (BioRad) transfer system. The following antibodies were  
505 used: streptavidin-HRP (Cell Signaling; 3999S), anti-Myc-tag  
506 mouse monoclonal antibody (Cell Signaling; 9B11), HRP-  
507 conjugated anti-mouse IgG antibody (Cell Signaling; 7076S).  
508 The membranes were probed for biotinylated proteins with  
509 streptavidin-HRP for 45 minutes to 3 hours at RT. For  
510 detection of miniTurbo-Myc, the membranes were probed with



511 anti-Myc-tag primary antibody overnight at 4 °C and then with  
512 anti-mouse IgG secondary antibody for 1 hour at RT.  
513 Biotinylated proteins or Myc-tagged miniTurbo were visualized  
514 on the membranes using a luminol-based chemiluminescent  
515 substrate that is oxidized by HRP in the presence of peroxide  
516 (Thermo Fisher; 34577). The membranes were stained with  
517 Coomassie staining solution (60 mg l<sup>-1</sup> Coomassie brilliant blue,  
518 10 % acetic acid) afterwards.

519

520 **Annotations and gene ontology analyses.** For *M. polymorpha*  
521 protein annotation, gene annotations from MpTak1\_v5.1 and  
522 JGI 3.1 (<https://marchantia.info/>) were integrated. Information  
523 of *A. thaliana* homologs was further used for the annotation. A  
524 Basic Local Alignment Search Tool (BLAST) was used to  
525 determine homologs in *A. thaliana* (TAIR10). The best hit with  
526 an e-value  $\leq 10^{-10}$  was defined as a homolog. TAIR10  
527 (<https://www.arabidopsis.org/>, (Lamesch *et al.*, 2012)),  
528 PANTHER version 16.0 (<http://pantherdb.org/>, (Mi *et al.*,  
529 2021)), STRING 11.5 (<https://string-db.org/>, (von Mering *et al.*,  
530 2003)), BioGrid 4.4 (<https://thebiogrid.org/>, (Stark *et al.*,  
531 2006)), and IntAct 1.0.2 (<https://www.ebi.ac.uk/intact/home>,  
532 (Orchard *et al.*, 2014)) were used for annotating *A. thaliana*  
533 homologs (Data S1). RStudio (version 1.4.1103,  
534 <https://www.rstudio.com/>), based on R (version x64 4.0.3,  
535 <https://cran.r-project.org/>), the tidyverse (version 1.3.0), rio  
536 (version 0.5.16), and zoo (version 1.8-8) packages, were used  
537 for integrating annotation files. GO-term enrichment  
538 analysis was performed with Metascape 3.5  
539 (<https://metascape.org/>, (Zhou *et al.*, 2019)) using express  
540 analysis settings. Corresponding *A. thaliana* homologs were  
541 used as input protein lists for the analysis. A list of reported and  
542 predicted interactors of AtSYP1 proteins was generated by  
543 integrating information from BioGrid, IntAct, and STRING  
544 databases (Data S2). BLAST was used to determine homologs

545 in *M. polymorpha* (JGI 3.1). The best hit with an e-value  $\leq 10^{-10}$   
546 were defined as a homolog (Data S3). PANTHER version  
547 16.0 and PPDB (<http://ppdb.tc.cornell.edu/>, (Sun *et al.*, 2009))  
548 were used to predict plasma membrane-localization of *M.*  
549 *polymorpha* homologs.  
550

551 **Results**

552 **Experimental design for interactomics using miniTurbo-**  
553 **mediated PL and Co-IP in *M. polymorpha***

554 To potentially enhance transcription and translation efficiency  
555 of the bait-ligase fusion-proteins in *M. polymorpha*, we used a  
556 codon-optimized version of the original miniTurbo (Fig. S1).  
557 We added a single Myc-tag to the C-terminus of miniTurbo,  
558 enabling not only the detection of the miniTurbo fusion-  
559 proteins by immunoblotting, but also Co-IP experiments (Fig.  
560 1a, Fig. S1). We designed binary vectors to express miniTurbo-  
561 Myc-MpSYP12A and miniTurbo-Myc-MpSYP13B fusion-  
562 proteins under the native promoters of *MpSYP12A* and  
563 *MpSYP13B* genes, respectively (Fig. 1a, Fig. S2). Using these  
564 constructs, we generated stable transgenic lines in wildtype  
565 Tak-1 background. Expression of the miniTurbo-Myc fusion-  
566 proteins in candidate transformant lines was confirmed by  
567 immunoblotting using an anti-Myc antibody. To establish and  
568 evaluate the miniTurbo-based interactomics method, we  
569 selected transgenic lines showing similar expression levels for  
570 miniTurbo-Myc-MpSYP12A and miniTurbo-Myc-MpSYP13B.  
571 For this study, we used line No. 1 and line No. 3 for  
572 miniTurbo-Myc-MpSYP12A and miniTurbo-Myc-MpSYP13B,  
573 respectively (Fig. S3a).

574 In *A. thaliana*, Mair *et al.* (2019) demonstrated that  
575 levels of miniTurbo-mediated biotinylation of cellular proteins  
576 saturated when plants were treated with 50  $\mu$ M biotin solution.  
577 Since uptake of exogenous biotin and levels of endogenously  
578 produced biotin are unknown in *M. polymorpha*, we treated the  
579 selected transgenic lines and Tak-1 with different  
580 concentrations of biotin, 0–700  $\mu$ M, to find suitable conditions  
581 for *in vivo* biotin-labelling. For biotin treatment, thalli were  
582 grown from single gemmae for 10 days, and then whole plants  
583 were submerged in biotin solutions and vacuum infiltrated for 5

584 minutes. We incubated the thalli in biotin solutions at 22–25 °C  
585 for 24 hours, a time point at which we expected a saturation of  
586 biotin-labelling based on previous studies using miniTurbo in  
587 other plant species (Mair *et al.*, 2019; Zhang *et al.*, 2019). We  
588 subsequently checked the levels of biotinylated proteins in cell  
589 extracts by immunoblotting using streptavidin-HRP (Fig. 1c,  
590 Fig. S4a). We found increasing levels of biotinylated proteins  
591 with increasing biotin concentration in cell extracts of  
592 transgenic lines expressing either miniTurbo-Myc-MpSYP12A  
593 or miniTurbo-Myc-MpSYP13B but not in Tak-1. This  
594 confirmed biotin uptake and miniTurbo biotin ligase activity in  
595 *M. polymorpha* under the tested conditions. Given that levels of  
596 biotinylated proteins did not saturate for biotin concentrations  
597 up to 700 µM in *M. polymorpha*, we used 700 µM biotin  
598 solution in all following experiments. To determine suitable  
599 biotin treatment times in *M. polymorpha*, we next performed a  
600 time-course experiment and checked the levels of biotinylated  
601 proteins by immunoblotting after 0–24 hours of biotin  
602 treatment (Fig. 1d). We detected increased levels of  
603 biotinylated proteins in samples of transgenic lines expressing  
604 either miniTurbo-Myc-MpSYP12A or miniTurbo-Myc-  
605 MpSYP13B after 30 minutes of treatment (Fig. S4b), which  
606 further increased over time up to 24 hours of treatment (Fig.  
607 1d).

608 Previously published studies using TurboID and  
609 miniTurbo identified the depletion of free biotin after labelling  
610 as a critical step for pulldown of biotinylated proteins using  
611 streptavidin beads (Mair *et al.*, 2019; Zhang *et al.*, 2019; Arora  
612 *et al.*, 2020; Zhang *et al.*, 2021). We therefore tested three  
613 different approaches, methanol:chloroform precipitation, PD-10  
614 gravity column desalting, and Zeba spin column desalting, to  
615 remove excess free biotin from *M. polymorpha* cell extracts.  
616 We used the miniTurbo-Myc-MpSYP13B line, which was  
617 treated with 700 µM biotin for 24 hours. We evaluated biotin

618 depletion based on pulldown efficiency, through  
619 immunoblotting of biotinylated proteins that could be eluted  
620 from the streptavidin-agarose beads after pulldown, and of non-  
621 bound biotinylated proteins that remained in the supernatant of  
622 the beads (Fig. S3b, c). We found that all three methods could  
623 be used before affinity-pulldown to sufficiently enrich  
624 biotinylated proteins from *M. polymorpha* samples (Fig. S3b).  
625 With respect to easier handling, we used PD-10 column  
626 desalting for subsequent experiments.

627

628 **The miniTurbo-based approach identifies a manifold of**  
629 **potential interactors of MpSYP12A and MpSYP13B in**  
630 **comparison to the Co-IP approach**

631 A direct comparison between the performances of PL and Co-  
632 IP approaches for interactomics using the same plant materials  
633 has not yet been reported. We therefore performed IP of  
634 miniTurbo-Myc-MpSYP12A or miniTurbo-Myc-MpSYP13B  
635 using Myc-Trap beads from the same selected transgenic lines.  
636 After IP, we checked successful pulldown of the miniTurbo-  
637 Myc fusion-proteins by immunoblotting. We detected  
638 miniTurbo-Myc-MpSYP12A and miniTurbo-Myc-MpSYP13B  
639 fusion-proteins in cell extract that was used as input for IP, and  
640 in IP-eluates of samples from the transgenic lines (Fig. S3d).  
641 We then identified and quantified the proteins captured by  
642 Myc-IP using MS. We found a significant enrichment of the  
643 two bait proteins (Fig. 2a), confirming the immunoblotting  
644 result. Using Co-IP, we identified 4 and 1 potential interactors  
645 of MpSYP12A and MpSYP13B, respectively (Fig. 2a).

646 For the PL approach, we treated plants with biotin for 4  
647 and 24 hours to identify and quantify proteins after pulldown  
648 by MS. As in the case of the Co-IP approach, we found a  
649 significant enrichment of both baits using the miniTurbo-based  
650 approach (Fig. 2b, c). Four hours of biotin treatment resulted in  
651 an identification of 214 and 189 proteins as potential interactors

652 of MpSYP12A and MpSYP13B, respectively (Fig. 2b). By  
653 increasing the treatment time to 24 hours, the numbers of  
654 identified potential interactors nearly tripled (Fig. 2c). As  
655 expected, most of the candidates identified from 4 hours'  
656 samples were also identified from 24 hours' samples (Fig. 2d).  
657 In other words, approximately one third of the candidates that  
658 were identified after 24 hours of biotin treatment could be  
659 identified after 4 hours of treatment. MpCSR1  
660 (CHLORSULFURON RESISTANT 1), a potential interactor of  
661 MpSYP12A and MpSYP13B that we identified using Co-IP,  
662 was identified in the 24 hours' PL interactome dataset as well  
663 (Fig. 2c). Overall, these results demonstrate that PL approaches  
664 have a higher potential to identify undescribed interacting  
665 proteins compared to Co-IP approaches. However, it should be  
666 noted that the miniTurbo-based approach failed to identify  
667 proteins like secretory peroxidases that are predicted to be  
668 secreted into the extracellular space (Fig. 2a). This is  
669 reasonable as miniTurbo was fused to the intracellular domain  
670 of MpSYPs.

671

672 **PL using MpSYP12A and MpSYP13B as baits enriches**  
673 **proteins involved in vesicle-mediated transport and plasma**  
674 **membrane-localized proteins**

675 We next asked whether the potential interactors that we  
676 identified by PL overall fit to the expected biological function  
677 of MpSYP12A and MpSYP13B. For this, we annotated *M.*  
678 *polymorpha* proteins based on information of *A. thaliana*  
679 homologs (Data S1). We then performed gene ontology (GO)-  
680 term enrichment analysis of the 24 hours interactome dataset  
681 using Metascape. Strikingly, 'vesicle-mediated transport' was  
682 the most significantly enriched GO-term extracted from the  
683 interactome data for both, MpSYP12A and MpSYP13B,  
684 coinciding with SNARE protein functions (Fig. 3a, b; Data S4).  
685 We also performed GO-term enrichment analysis of proteome

686 data that were obtained by measuring the input samples used  
687 for the streptavidin-pulldown. Enriched GO-terms from  
688 proteome data were mainly related to primary metabolism (Fig.  
689 3c), which is clearly distinct from the enriched GO-terms of the  
690 interactome dataset (Fig. 3a, b). These results suggest that the  
691 potential interactors comprise actual interactors of MpSYP12A  
692 and MpSYP13B. Analysis of the 4 hours interactome dataset  
693 gave similar results (Fig. S5a, b; Data S4).

694 A number of interactors of *A. thaliana* SNAREs, which  
695 are homologous to MpSYP12A and MpSYP13B, have been  
696 reported (Kwon *et al.*, 2008; Fujiwara *et al.*, 2014). Based on  
697 BioGrid, STRING, and IntAct databases, a total of 334 proteins  
698 were reported or predicted to interact with SYP1 proteins in *A.*  
699 *thaliana* (Data S2). Of these 334 *A. thaliana* proteins, we could  
700 identify 250 homologous proteins conserved in the *M.*  
701 *polymorpha* proteome using a BLAST approach (Data S3).  
702 Among these 250 proteins, we found that 47 and 40 proteins  
703 were identified as potential interactors of MpSYP12A and  
704 MpSYP13B, while 39 were shared between both baits,  
705 respectively. This means that around 11–15 % of all potential  
706 interactors of MpSYP12A and MpSYP13B revealed by the  
707 miniTurbo-based approach are homologous to known  
708 interactors of *A. thaliana* SYP1 proteins (Fig. 3d).

709 MpSYP12A and MpSYP13B were demonstrated to  
710 localize to the plasma membrane and to be ubiquitously  
711 expressed throughout the thallus in *M. polymorpha* (Kanazawa  
712 *et al.*, 2016). By using PANTHER GO annotations and *A.*  
713 *thaliana* plasma membrane proteome data, we predicted plasma  
714 membrane localizations of the potential interactors in *M.*  
715 *polymorpha* (Data S1). We found that more than one third of  
716 the potential interactors are expected to be plasma membrane-  
717 localized (Fig. 3e). This result further supported the specificity  
718 and utility of the miniTurbo-based approach.

719

720 **The miniTurbo-mediated approach can reveal subtle**  
721 **differences between very similar baits**

722 By comparing the 24 hours interactome data for MpSYP12A  
723 and MpSYP13B, we found that both baits share 90–95 % of  
724 their potential interactors (Fig. 1c), which is reasonable  
725 considering their predicted functions. Still, we captured 52 and  
726 9 proteins that preferentially interact with MpSYP12A and  
727 MpSYP13B, respectively (Fig. 4a, Table 1). To investigate  
728 exclusive interaction partners of MpSYP12A and MpSYP13B,  
729 we implemented iBAQ (Intensity Based Absolute  
730 Quantification) values to the volcano plot (Fig. 4b). The iBAQ  
731 is a measure of protein abundance, and relative abundance was  
732 reflected in different circle sizes. The respective colours  
733 indicate abundances in all pulldown samples. By this, we  
734 revealed that MpNEK potentially interacts exclusively with  
735 MpSYP13B, and we found 13 proteins that potentially interact  
736 exclusively with MpSYP12A (Fig. 4b, Table 1).

737



738 **Discussion**

739 Published studies applying *in planta* TurboID-based PL have  
740 utilized model angiosperm species, and the amenability of  
741 current PL approaches to other plant species remains to be  
742 determined as outlined by Mair and Bergmann (2021). Here,  
743 we successfully applied miniTurbo-based PL in the liverwort  
744 *M. polymorpha*. This confirmed the transferability of biotin  
745 ligase utilized interactomics to a model bryophyte species.

746 We tested different biotin concentrations and treatment  
747 times to investigate biotin-labelling of proteins in *M.*  
748 *polymorpha* cells. Mair *et al.* (2019) reported a saturation of  
749 biotinylated proteins in *A. thaliana* stable transgenic lines after  
750 treatment with 50  $\mu\text{M}$  biotin solution for 1 hour. Zhang *et al.*  
751 (2019) transiently expressed TurboID-fusion-proteins in *N.*  
752 *benthamiana* leaves and tested biotin concentrations up to 800  
753  $\mu\text{M}$ . Zhang *et al.* observed that protein biotinylation was  
754 saturated after 8 hours of treatment with 200  $\mu\text{M}$  biotin, and  
755 that 15 minutes were sufficient for the saturation at 200  $\mu\text{M}$   
756 biotin concentration. Meanwhile, in *M. polymorpha*, we did not  
757 observe a saturation of protein biotinylation after 24 hours of  
758 treatment with 700  $\mu\text{M}$  biotin. The observed differences in  
759 saturation of biotinylated proteins among the different studies  
760 could be partially explained by differences in mechanisms and  
761 efficiencies for biotin uptake and metabolism. Other factors  
762 potentially impacting biotin-labelling activities are plant growth  
763 conditions like light cycle and temperature used during biotin  
764 treatment.

765 For PL approaches, a careful evaluation of false positive  
766 candidates based on well-designed controls is desirable to  
767 generate a set of candidates with high confidence for further  
768 analyses and validation. It would be beneficial to include other  
769 plasma membrane-localized proteins that are independent of  
770 MpSYP12A and MpSYP13B to aid in predicting false positive

771 candidates, which might have been biotinylated randomly due  
772 to their localizations. That is to say, our transgenic lines  
773 expressing miniTurbo-Myc-MpSYP12A and miniTurbo-Myc-  
774 MpSYP13B could be used as suitable controls for interactome  
775 mapping using other plasma membrane-localized baits in the  
776 future. Meanwhile, the overall high similarity between  
777 MpSYP12A and MpSYP13B can be exploited to investigate  
778 specific interactors to understand functional differences  
779 between the two SNAREs. In general, long biotin treatment  
780 times potentially increase false positive labelling. On the other  
781 hand, longer treatment times may be required to efficiently  
782 capture rare or transient interactors.

783 For biotin-labelling approaches, protein extraction can  
784 be conducted in the presence of strong detergents. Strong  
785 detergents facilitate the extraction and solubilization of  
786 membrane-associated proteins, which can be advantageous for  
787 interactomics of plasma membrane-localized or organellar  
788 proteins. Our results confirmed that we could indeed capture a  
789 manifold of proteins that are predicted to be plasma membrane-  
790 localized, which has not been tested on the proteome level in  
791 published studies using PL in plants. In contrast to the Co-IP  
792 approach, the miniTurbo-based method could not capture  
793 extracellular interactors of MpSYP12A and MpSYP13B, which  
794 can be a drawback for certain applications. In the future, it  
795 remains to be determined whether the miniTurbo-based  
796 approach is also suitable for other cellular compartments,  
797 which may have a different intraorganellar pH or temperature,  
798 as discussed by Mair and Bergmann (2021).

799 Until to date, a manifold of interaction partners of  
800 AtSYP1 family proteins has been identified or predicted (Kwon  
801 *et al.*, 2008; *Arabidopsis* Interactome Mapping Consortium,  
802 2011; Fujiwara *et al.*, 2014);. With our miniTurbo-based  
803 approach, we were able to capture homologs to well-known  
804 AtSYP1-interacting proteins, such as KEU, NPSN11, SYP61,

805 and VAMP721 (Fujiwara *et al.*, 2014), demonstrating the  
806 reliability of our method. We identified 47 and 40 proteins that  
807 are homologous to previously described AtSYP1-interacting  
808 proteins, while 104 and 92 proteins were linked to ‘vesicle-  
809 mediated transport’ based on our GO-term enrichment analysis.  
810 This indicates that we were able to capture a number of  
811 undescribed potential interactors of MpSYP12A and  
812 MpSYP13B, respectively. Kanazawa *et al.* (2020) were able to  
813 show that MpSYP12A but not MpSYP13B localized to the  
814 phragmoplast during cell plate formation by using fluorescent  
815 reporter-lines. Based on our GO-term enrichment analysis, we  
816 found the same set of 30 proteins related to ‘cell plate  
817 formation’ in interactomes of both, MpSYP12A and  
818 MpSYP13B. In other words, we failed to identify unique  
819 potential interactors of MpSYP12A previously linked to ‘cell  
820 plate formation’. To address a role of MpSYP12A at the  
821 phragmoplast, experimental conditions would need to be  
822 further adjusted to capture the interactome during cell division,  
823 by using cell cycle specific promoters to express proteins in  
824 dividing cells, for instance.

825 Our miniTurbo-based approach identified a number of  
826 potential interactors that are specific for MpSYP12A and  
827 MpSYP13B, which may help to understand functional  
828 differences between the two SNAREs in the future. For  
829 example, we found that homologs to MILDEW RESISTANCE  
830 LOCUS O (MLO) and PENETRATION 3 (PEN3)  
831 preferentially interact with MpSYP12A. *MLO* genes were  
832 shown to be involved in susceptibility to powdery mildew  
833 pathogens in barley (Büschges *et al.*, 1997) and *A. thaliana*  
834 (Consonni *et al.*, 2006). *AtPEN3* was found to be involved in  
835 resistance against barley powdery mildew (Stein *et al.*, 2006)  
836 and cell-death responses upon infection with *P. infestans*  
837 (Kobae *et al.*, 2006). In *A. thaliana*, AtSYP121 or  
838 PENETRATION1 (PEN1) is homologous to MpSYP12A.

839 *AtPEN1* was shown to be required for SNARE-dependent  
840 penetration resistance against barley powdery mildew and  
841 pathogen-induced vesicle accumulation was enhanced in *MLO*  
842 loss-of-function mutants (Collins *et al.*, 2003). Recently,  
843 Rubiato *et al.* (Rubiato *et al.*, 2021) provided evidence for an  
844 evolutionary conserved role of SYP12 proteins in the formation  
845 of papillae and encasements at pathogen penetration sites,  
846 which are effective defence structures against a broad range of  
847 filamentous pathogens. Taken together, our data suggest a  
848 function of MpSYP12A in penetration resistance and responses  
849 to filamentous pathogens, like SYP12 proteins in other plant  
850 species. Besides, we found that MpSYP12A may exclusively  
851 interact with ABSCISIC ACID INSENSITIVE1 (MpABI1),  
852 NUCLEAR MATRIX CONSTITUENT PROTEIN  
853 (MpNMCP), and homologs of OROSOMUCOID-LIKE 1  
854 (ORM1) and SENSITIVE TO FREEZING 2 (SFR2). MpABI1  
855 is involved in abscisic acid signalling (Tougane *et al.*, 2010)  
856 and MpNMCP was found to function in stress signalling in *M.*  
857 *polymorpha* (Wang *et al.*, 2021). In *A. thaliana*, NMCP  
858 homologs play a role in immunity (Choi *et al.*, 2019; Jarad *et*  
859 *al.*, 2019). AtORMs were reported to play roles in sphingolipid  
860 homeostasis and stress responses (Li *et al.*, 2016), and AtSFR2  
861 is a membrane remodelling enzyme responsive to freezing  
862 conditions in *A. thaliana* (Barnes *et al.*, 2019). Accordingly,  
863 our findings may suggest a potential role of MpSYP12A in  
864 lipid homeostasis and stress responses. We identified NIMA-  
865 related protein kinase 1 (MpNEK) as potential exclusive  
866 interactor for MpSYP13B. MpNEK directs tip growth in  
867 rhizoids of *M. polymorpha* (Otani *et al.*, 2018), and thus our  
868 data may suggest a potential role of MpSYP13B in rhizoid tip  
869 growth. It should be noted that potential interactors revealed by  
870 PL need to be validated using complementary approaches. In  
871 summary, our interactome data should be a useful resource for

872 future investigations of functional conservation and  
873 diversification of SNARE proteins in plants.  
874  
875

876 **Acknowledgements**

877 We thank Takashi Ueda (National Institutes of Natural  
878 Sciences, Division of Cellular Dynamics, Tokyo, Japan) for  
879 providing the plasmids harbouring genomic sequences for  
880 native expression and regulation of MpSYP12A and  
881 MpSYP13B. We thank Takayuki Kohchi (Kyoto University,  
882 Japan) for providing pMpGWB vectors.

883

884 **Author Contribution**

885 KM and HN have designed the research. KM, SCS, AH, and  
886 HN have contributed to experimental design and workflow  
887 conceptualization. KM, SCS, and AH have conducted  
888 experiments. KM, SCS, and HN have analysed the data by  
889 mass spectrometry. KM, SCS, and HN wrote the manuscript.  
890 This project was supported by the Max Planck Society and was  
891 conducted in the framework of MAdLand  
892 (<http://madland.science>, Deutsche Forschungsgemeinschaft  
893 (DFG) priority program 2237). HN is grateful for funding by  
894 the DFG (NA 946/1-1).

895

896 **Data Availability**

897 The mass spectrometry proteomics data have been deposited to  
898 the ProteomeXchange Consortium via the PRIDE [1] partner  
899 repository with the dataset identifier PXD030429.

900

901 **References**

- 902 **Arora D, Abel NB, Liu C, Van Damme P, Yperman K, Eeckhout D, Vu**  
903 **LD, Wang J, Tornkvist A, Impens F, et al. 2020.**  
904 Establishment of Proximity-Dependent Biotinylation  
905 Approaches in Different Plant Model Systems. *Plant Cell*  
906 **32(11): 3388-3407.**
- 907 **Baldet P, Alban C, Douce R. 1997.** Biotin synthesis in higher plants:  
908 purification and characterization of bioB gene product  
909 equivalent from *Arabidopsis thaliana* overexpressed  
910 in *Escherichia coli* and its subcellular localization in pea leaf  
911 cells. *FEBS Letters* **419(2-3): 206-210.**
- 912 **Baldet P, Gerbling H, Axiotis S, Douce R. 1993.** Biotin biosynthesis in  
913 higher plant cells. *Eur. J. Biochem.* **217: 479-485.**
- 914 **Barnes AC, Elowsky CG, Roston RL. 2019.** An *Arabidopsis* protoplast  
915 isolation method reduces cytosolic acidification and  
916 activation of the chloroplast stress sensor SENSITIVE TO  
917 FREEZING 2. *Plant Signal Behav* **14(9): 1629270.**
- 918 **Batoko H, Moore I. 2001.** Plant cytokinesis: KNOLLE joins the club.  
919 *Curr Biol* **11: R423-R426.**
- 920 **Bowman JL, Kohchi T, Yamato KT, Jenkins J, Shu S, Ishizaki K,**  
921 **Yamaoka S, Nishihama R, Nakamura Y, Berger F, et al.**  
922 **2017.** Insights into Land Plant Evolution Garnered from the  
923 *Marchantia polymorpha* Genome. *Cell* **171(2): 287-304**  
924 **e215.**
- 925 **Branon TC, Bosch JA, Sanchez AD, Udeshi ND, Svinkina T, Carr SA,**  
926 **Feldman JL, Perrimon N, Ting AY. 2018.** Efficient proximity  
927 labeling in living cells and organisms with TurboID. *Nat*  
928 *Biotechnol* **36(9): 880-887.**
- 929 **Büsches R, Hollricher K, Panstruga R, Simons G, Wolter M, Frijters**  
930 **A, van Daelen R, van der Lee T, Diergaarde P, Groenendijk**  
931 **J, et al. 1997.** The Barley Mlo Gene: A Novel Control Element  
932 of Plant Pathogen Resistance. *Cell* **88: 695-705.**
- 933 **Carella P, Gogleva A, Tomaselli M, Alfs C, Schornack S. 2018.**  
934 *Phytophthora palmivora* establishes tissue-specific  
935 intracellular infection structures in the earliest divergent  
936 land plant lineage. *Proc Natl Acad Sci U S A* **115(16): E3846-**  
937 **E3855.**
- 938 **Catalano CM, Czymmek KJ, Gann JG, Sherrier DJ. 2007.** *Medicago*  
939 *truncatula* syntaxin SYP132 defines the symbiosome  
940 membrane and infection droplet membrane in root nodules.  
941 *Planta* **225(3): 541-550.**
- 942 **Chawade A, Alexandersson E, Levander F. 2014.** Normalyzer: a tool  
943 for rapid evaluation of normalization methods for omics  
944 data sets. *J Proteome Res* **13(6): 3114-3120.**
- 945 **Choi J, Strickler SR, Richards EJ. 2019.** Loss of CRWN Nuclear  
946 Proteins Induces Cell Death and Salicylic Acid Defense  
947 Signaling. *Plant Physiol* **179(4): 1315-1329.**
- 948 **Collins NC, Thordal-Christensen HVL, V., Bau S, Kombrink E, Qiu J-L,**  
949 **Hückelhoven R, Stein M, Freialdenhoven A, Somerville SC,**

- 950 **Schulze-Lefert P. 2003.** SNARE-protein-mediated disease  
951 resistance at the plant cell wall. *Nature* **425**: 973-977.
- 952 **Consonni C, Humphry ME, Hartmann HA, Livaja M, Durner J,**  
953 **Westphal L, Vogel J, Lipka V, Kemmerling B, Schulze-Lefert**  
954 **P, et al. 2006.** Conserved requirement for a plant host cell  
955 protein in powdery mildew pathogenesis. *Nat Genet* **38**(6):  
956 716-720.
- 957 **Consortium AIM. 2011.** Evidence for Network Evolution in an  
958 Arabidopsis Interactome Map. *Science* **333**: 601-607.
- 959 **Cox J, Mann M. 2008.** MaxQuant enables high peptide identification  
960 rates, individualized p.p.b.-range mass accuracies and  
961 proteome-wide protein quantification. *Nat Biotechnol*  
962 **26**(12): 1367-1372.
- 963 **Enami K, Ichikawa M, Uemura T, Kutsuna N, Hasezawa S,**  
964 **Nakagawa T, Nakano A, Sato MH. 2009.** Differential  
965 expression control and polarized distribution of plasma  
966 membrane-resident SYP1 SNAREs in Arabidopsis thaliana.  
967 *Plant Cell Physiol* **50**(2): 280-289.
- 968 **Fujiwara M, Uemura T, Ebine K, Nishimori Y, Ueda T, Nakano A,**  
969 **Sato MH, Fukao Y. 2014.** Interactomics of Qa-SNARE in  
970 Arabidopsis thaliana. *Plant Cell Physiol* **55**(4): 781-789.
- 971 **Hirano T, Ebine K, Ueda T, Higaki T, Nakayama T, Konno H,**  
972 **Takigawa-Imamura H, Sato MH. 2020.** The SYP123-  
973 VAMP727 SNARE complex is involved in the delivery of inner  
974 cell wall components to the root hair shank in Arabidopsis.  
975 *bioRxiv*.
- 976 **Ichikawa M, Hirano T, Enami K, Fuselier T, Kato N, Kwon C, Voigt B,**  
977 **Schulze-Lefert P, Baluska F, Sato MH. 2014.** Syntaxin of  
978 plant proteins SYP123 and SYP132 mediate root hair tip  
979 growth in Arabidopsis thaliana. *Plant Cell Physiol* **55**(4): 790-  
980 800.
- 981 **Ishizaki K, Chiyoda S, Yamato KT, Kohchi T. 2008.** Agrobacterium-  
982 mediated transformation of the haploid liverwort  
983 *Marchantia polymorpha* L., an emerging model for plant  
984 biology. *Plant Cell Physiol* **49**(7): 1084-1091.
- 985 **Ishizaki K, Johzuka-Hisatomi Y, Ishida S, Iida S, Kohchi T. 2013.**  
986 Homologous recombination-mediated gene targeting in the  
987 liverwort *Marchantia polymorpha* L. *Sci Rep* **3**: 1532.
- 988 **Ishizaki K, Nishihama R, Ueda M, Inoue K, Ishida S, Nishimura Y,**  
989 **Shikanai T, Kohchi T. 2015.** Development of Gateway Binary  
990 Vector Series with Four Different Selection Markers for the  
991 Liverwort *Marchantia polymorpha*. *PLoS One* **10**(9):  
992 e0138876.
- 993 **Jarad M, Mariappan K, Almeida-Trapp M, Mette MF, Mithofer A,**  
994 **Rayapuram N, Hirt H. 2019.** The Lamin-Like LITTLE NUCLEI 1  
995 (LINC1) Regulates Pattern-Triggered Immunity and Jasmonic  
996 Acid Signaling. *Front Plant Sci* **10**: 1639.
- 997 **Johansson ON, Fantozzi E, Fahlberg P, Nilsson AK, Buhot N, Tor M,**  
998 **Andersson MX. 2014.** Role of the penetration-resistance  
999 genes PEN1, PEN2 and PEN3 in the hypersensitive response



- 1000 and race-specific resistance in *Arabidopsis thaliana*. *Plant J*  
1001 **79**(3): 466-476.
- 1002 **Kanazawa T, Era A, Minamino N, Shikano Y, Fujimoto M, Uemura T,**  
1003 **Nishihama R, Yamato KT, Ishizaki K, Nishiyama T, et al.**  
1004 **2016.** SNARE Molecules in *Marchantia polymorpha*: Unique  
1005 and Conserved Features of the Membrane Fusion  
1006 Machinery. *Plant Cell Physiol* **57**(2): 307-324.
- 1007 **Kanazawa T, Morinaka H, Ebine K, Shimada TL, Ishida S, Minamino**  
1008 **N, Yamaguchi K, Shigenobu S, Kohchi T, Nakano A, et al.**  
1009 **2020.** The liverwort oil body is formed by redirection of the  
1010 secretory pathway. *Nat Commun* **11**(1): 6152.
- 1011 **Kobae Y, Sekino T, Yoshioka H, Nakagawa T, Martinoia E,**  
1012 **Maeshima M. 2006.** Loss of AtPDR8, a plasma membrane  
1013 ABC transporter of *Arabidopsis thaliana*, causes  
1014 hypersensitive cell death upon pathogen infection. *Plant Cell*  
1015 *Physiol* **47**(3): 309-318.
- 1016 **Kubota A, Ishizaki K, Hosaka M, Kohchi T. 2013.** Efficient  
1017 *Agrobacterium*-mediated transformation of the liverwort  
1018 *Marchantia polymorpha* using regenerating thalli. *Biosci*  
1019 *Biotechnol Biochem* **77**(1): 167-172.
- 1020 **Kwon C, Neu C, Pajonk S, Yun HS, Lipka U, Humphry M, Bau S,**  
1021 **Straus M, Kwaaitaal M, Rampelt H, et al. 2008.** Co-option of  
1022 a default secretory pathway for plant immune responses.  
1023 *Nature* **451**(7180): 835-840.
- 1024 **Lamesch P, Berardini TZ, Li D, Swarbreck D, Wilks C, Sasidharan R,**  
1025 **Muller R, Dreher K, Alexander DL, Garcia-Hernandez M, et**  
1026 **al. 2012.** The *Arabidopsis* Information Resource (TAIR):  
1027 improved gene annotation and new tools. *Nucleic Acids Res*  
1028 **40**(Database issue): D1202-1210.
- 1029 **Li J, Yin J, Rong C, Li KE, Wu JX, Huang LQ, Zeng HY, Sahu SK, Yao N.**  
1030 **2016.** Orosomucoid Proteins Interact with the Small Subunit  
1031 of Serine Palmitoyltransferase and Contribute to  
1032 Sphingolipid Homeostasis and Stress Responses in  
1033 *Arabidopsis*. *Plant Cell* **28**(12): 3038-3051.
- 1034 **Ludwig A, Stolz J, Sauer N. 2000.** Plant sucrose-H<sup>+</sup> symporters  
1035 mediate the transport of vitamin H. *The Plant Journal* **24**(4):  
1036 503-509.
- 1037 **Mair A, Bergmann DC. 2021.** Advances in enzyme-mediated  
1038 proximity labeling and its potential for plant research. *Plant*  
1039 *Physiol*.
- 1040 **Mair A, Xu SL, Branon TC, Ting AY, Bergmann DC. 2019.** Proximity  
1041 labeling of protein complexes and cell-type-specific  
1042 organellar proteomes in *Arabidopsis* enabled by TurboID.  
1043 *Elife* **8**.
- 1044 **Mi H, Ebert D, Muruganujan A, Mills C, Albou LP, Mushayamaha T,**  
1045 **Thomas PD. 2021.** PANTHER version 16: a revised family  
1046 classification, tree-based classification tool, enhancer  
1047 regions and extensive API. *Nucleic Acids Res* **49**(D1): D394-  
1048 D403.
- 1049 **Montgomery SA, Tanizawa Y, Galik B, Wang N, Ito T, Mochizuki T,**  
1050 **Akimcheva S, Bowman JL, Cognat V, Marechal-Drouard L,**

- 1051 **et al. 2020.** Chromatin Organization in Early Land Plants  
1052 Reveals an Ancestral Association between H3K27me3,  
1053 Transposons, and Constitutive Heterochromatin. *Curr Biol*  
1054 **30**(4): 573-588 e577.
- 1055 **Orchard S, Ammari M, Aranda B, Breuza L, Briganti L, Broackes-**  
1056 **Carter F, Campbell NH, Chavali G, Chen C, del-Toro N, et al.**  
1057 **2014.** The MIntAct project--IntAct as a common curation  
1058 platform for 11 molecular interaction databases. *Nucleic*  
1059 *Acids Res* **42**(Database issue): D358-363.
- 1060 **Otani K, Ishizaki K, Nishihama R, Takatani S, Kohchi T, Takahashi T,**  
1061 **Motose H. 2018.** An evolutionarily conserved NIMA-related  
1062 kinase directs rhizoid tip growth in the basal land plant  
1063 *Marchantia polymorpha*. *Development* **145**(5).
- 1064 **Pommerrenig B, Popko J, Heilmann M, Schulmeister S, Dietel K,**  
1065 **Schmitt B, Stadler R, Feussner I, Sauer N. 2013.** SUCROSE  
1066 TRANSPORTER 5 supplies Arabidopsis embryos with biotin  
1067 and affects triacylglycerol accumulation. *Plant J* **73**(3): 392-  
1068 404.
- 1069 **Rappsilber J, Ishihama Y, Mann M. 2003.** Stop and Go Extraction  
1070 Tips for Matrix-Assisted Laser Desorption/Ionization,  
1071 Nanoelectrospray, and LC/MS Sample Pretreatment in  
1072 Proteomics. *Anal Chem* **75**: 663-670.
- 1073 **Reichardt I, Slane D, El Kasmi F, Knoll C, Fuchs R, Mayer U, Lipka V,**  
1074 **Jurgens G. 2011.** Mechanisms of functional specificity  
1075 among plasma-membrane syntaxins in Arabidopsis. *Traffic*  
1076 **12**(9): 1269-1280.
- 1077 **Rubiato HM, Liu M, O'Connell RJ, Nielsen ME. 2021.** Plant SYP12  
1078 syntaxins mediate an evolutionarily conserved general  
1079 immunity to filamentous pathogens. *bioRxiv*.
- 1080 **Sanderfoot A. 2007.** Increases in the number of SNARE genes  
1081 parallels the rise of multicellularity among the green plants.  
1082 *Plant Physiol* **144**(1): 6-17.
- 1083 **Silva PA, Ul-Rehman R, Rato C, Di Sansebastiano G-P, Malhó R.**  
1084 **2010.** Asymmetric localization of Arabidopsis SYP124  
1085 syntaxin at the pollen tube apical and sub-apical zones is  
1086 involved in tip growth. *BMC Plant Biol* **10**(179): 1-12.
- 1087 **Stark C, Breitkreutz BJ, Reguly T, Boucher L, Breitkreutz A, Tyers M.**  
1088 **2006.** BioGRID: a general repository for interaction datasets.  
1089 *Nucleic Acids Res* **34**(Database issue): D535-539.
- 1090 **Stein M, Dittgen J, Sanchez-Rodriguez C, Hou BH, Molina A,**  
1091 **Schulze-Lefert P, Lipka V, Somerville S. 2006.** Arabidopsis  
1092 PEN3/PDR8, an ATP binding cassette transporter,  
1093 contributes to nonhost resistance to inappropriate  
1094 pathogens that enter by direct penetration. *Plant Cell* **18**(3):  
1095 731-746.
- 1096 **Sun Q, Zybailov B, Majeran W, Friso G, Olinares PD, van Wijk KJ.**  
1097 **2009.** PPDB, the Plant Proteomics Database at Cornell.  
1098 *Nucleic Acids Res* **37**(Database issue): D969-974.
- 1099 **Tougane K, Komatsu K, Bhyan SB, Sakata Y, Ishizaki K, Yamato KT,**  
1100 **Kohchi T, Takezawa D. 2010.** Evolutionarily conserved  
1101 regulatory mechanisms of abscisic acid signaling in land

1102 plants: characterization of ABSCISIC ACID INSENSITIVE1-like  
1103 type 2C protein phosphatase in the liverwort *Marchantia*  
1104 polymorpha. *Plant Physiol* **152**(3): 1529-1543.  
1105 **Tyanova S, Temu T, Cox J. 2016.** The MaxQuant computational  
1106 platform for mass spectrometry-based shotgun proteomics.  
1107 *Nat Protoc* **11**(12): 2301-2319.  
1108 **Uemura T, Kim H, Saito C, Ebine K, Ueda T, Schulze-Lefert P,**  
1109 **Nakano A. 2012.** Qa-SNAREs localized to the trans-Golgi  
1110 network regulate multiple transport pathways and  
1111 extracellular disease resistance in plants. *Proc Natl Acad Sci*  
1112 *U S A* **109**(5): 1784-1789.  
1113 **Uemura T, Ueda T, Ohniwa RL, Nakano A, Takeyasu K, Sato MH.**  
1114 **2004.** Systematic Analysis of SNARE Molecules in  
1115 Arabidopsis: Dissection of the post-Golgi Network in Plant  
1116 Cells. *CELL STRUCTURE AND FUNCTION* **29**: 49-65.  
1117 **von Mering C, Huynen M, Jaeggi D, Schmidt S, Bork P, Snel B. 2003.**  
1118 STRING: a database of predicted functional associations  
1119 between proteins. *Nucleic Acids Res* **31**(1): 258-261.  
1120 **Wang N, Karaaslan ES, Faiss N, Berendzen KW, Liu C. 2021.**  
1121 Characterization of a Plant Nuclear Matrix Constituent  
1122 Protein in Liverwort. *Front Plant Sci* **12**: 670306.  
1123 **Wisniewski JR, Zougman A, Nagaraj N, Mann M. 2009.** Universal  
1124 sample preparation method for proteome analysis. *Nat*  
1125 *Methods* **6**(5): 359-362.  
1126 **Xia L, Mar Marques-Bueno M, Bruce CG, Karnik R. 2019.** Unusual  
1127 Roles of Secretory SNARE SYP132 in Plasma Membrane H(+)-  
1128 ATPase Traffic and Vegetative Plant Growth. *Plant Physiol*  
1129 **180**(2): 837-858.  
1130 **Yun HS, Kang BG, Kwon C. 2016.** Arabidopsis immune secretory  
1131 pathways to powdery mildew fungi. *Plant Signal Behav*  
1132 **11**(10): e1226456.  
1133 **Zhang Y, Li Y, Wen Z, Nagalakshmi U, Dinesh-Kumar SP. 2021.**  
1134 TurboID-Based Proximity Labeling for In Planta Identification  
1135 of Protein-Protein Interaction Networks. *J Vis Exp*: 1-15.  
1136 **Zhang Y, Song G, Lal NK, Nagalakshmi U, Li Y, Zheng W, Huang PJ,**  
1137 **Branon TC, Ting AY, Walley JW, et al. 2019.** TurboID-based  
1138 proximity labeling reveals that UBR7 is a regulator of N NLR  
1139 immune receptor-mediated immunity. *Nat Commun* **10**(1):  
1140 3252.  
1141 **Zhou Y, Zhou B, Pache L, Chang M, Khodabakhshi AH, Tanaseichuk**  
1142 **O, Benner C, Chanda SK. 2019.** Metascape provides a  
1143 biologist-oriented resource for the analysis of systems-level  
1144 datasets. *Nat Commun* **10**(1): 1523.  
1145  
1146  
1147

1148 **Figure legends**

1149

1150 **Fig. 1 Experimental setup for miniTurbo-mediated biotin-labelling in**  
1151 ***M. polymorpha*.** (a) Schematic representation of the constructs used for  
1152 generating transgenic plants. (b) Overview of the workflow used for  
1153 evaluating the miniTurbo-based interactomics method in *M. polymorpha*.  
1154 The figure was created with elements from BioRender  
1155 (<https://biorender.com>). (c and d) Biotin ligase activity in *M. polymorpha*.  
1156 Streptavidin (SA) immunoblots (IB) of cell extracts from *M. polymorpha*  
1157 transgenic lines expressing miniTurbo-Myc-MpSYP12A (upper panels) and  
1158 miniTurbo-Myc-MpSYP13B (lower panels) that were (c) treated with  
1159 0–700  $\mu$ M biotin solutions for 24 hours at RT or (d) treated with 700  $\mu$ M  
1160 biotin solution for 0–24 hours at RT. Cell extracts of wildtype Tak-1 (WT)  
1161 treated with 700  $\mu$ M biotin solution for 24 hours were used as a control.  
1162 Arrows indicate the positions of the biotinylated miniTurbo-Myc-  
1163 MpSYP12A and miniTurbo-Myc-MpSYP13B fusion-proteins. Coomassie  
1164 Brilliant Blue-stained (CBB) membranes are shown as loading controls.

1165

1166 **Fig. 2 Identification of MpSYP12A or MpSYP13B interacting proteins**  
1167 **by Co-IP and PL approaches.** Wildtype Tak-1 was used as a control, and  
1168 proteins that are significantly co-purified with or biotinylated by baits are  
1169 highlighted. Potential interacting proteins for MpSYP12A and MpSYP13B  
1170 are shown in turquoise and magenta, respectively. Venn diagrams show  
1171 numbers of the potential interactors and their overlaps. (a) Myc-Trap Co-IP.  
1172 Black text labels in volcano plots indicate the potential interactors for  
1173 MpSYP12A or MpSYP13B. (b) 4 hours PL. (c) 24 hours PL. (d) Overlaps  
1174 between 4 hours and 24 hours PL. Black circles in volcano plots indicate the  
1175 potential interactors that are also identified with 4 hours PL. Dark grey  
1176 circles indicate proteins that are identified as the potential interactors with 4  
1177 hours PL but not with 24 hours PL.

1178

1179 **Fig. 3 Features of the identified MpSYP12A or MpSYP13B interacting**  
1180 **proteins (a - c)** GO-term enrichment analysis of (a) 24 hours PL  
1181 MpSYP12A interactome, (b) 24 hours PL MpSYP13B interactome, and (c)  
1182 measured whole proteome. The top 20 overrepresented GO-terms are  
1183 shown. (d) *M. polymorpha* homologs of AtSYP1-interacting proteins are  
1184 highlighted in black or grey on volcano plots of 24 hours PL. Venn diagram  
1185 shows numbers of potential interactors that are homologous to the AtSYP1-  
1186 interactors and their overlaps. (e) Potential interactors that are predicted to  
1187 localize to the plasma membrane are highlighted in black or grey on volcano

1188 plots of 24 hours PL. Venn diagram shows numbers of the predicted plasma  
1189 membrane-localized proteins and their overlaps.

1190

1191 **Fig. 4 Potential interactors that preferentially interact with MpSYP12A**  
1192 **or MpSYP13B.** (a) Proteins that preferentially interacted with MpSYP12A  
1193 or MpSYP13B are highlighted in turquoise and magenta, respectively. (b)  
1194 Relative protein abundances based on iBAQ values are indicated by sizes of  
1195 circles. Protein abundances in the samples of MpSYP12A, MpSYP13B, and  
1196 wildtype Tak-1 are shown in turquoise, magenta, and dark grey,  
1197 respectively. Proteins that were exclusively identified from the samples of  
1198 MpSYP12A or MpSYP13B but not from the wildtype Tak-1 sample are  
1199 annotated except for MpSYP12A and MpSYP13B.

1200

1201 **Table 1 Potential interactors that preferentially interact with**  
1202 **MpSYP12A or MpSYP13B.** Proteins that are highlighted in turquoise or  
1203 magenta in Fig. 4 are listed.

1204

1205 **Fig. S1 Nucleotide and amino acid sequence of the miniTurbo biotin**  
1206 **ligase used in this study.** The nucleotide sequence of the original  
1207 miniTurbo (Branon et al., 2018) was modified based on preferential codon-  
1208 usage of *M. polymorpha*. A linker sequence of 15 amino acids length was  
1209 added to the C-terminus of miniTurbo, to minimize potential sterical  
1210 impairments of the enzymatic function. The linker sequence was fused to a  
1211 single Myc-tag peptide of 10 amino acids length, to enable immunoblot  
1212 detection of miniTurbo-fusion proteins and affinity purification using Myc-  
1213 Trap.

1214

1215 **Fig. S2 Plasmid maps of the binary vectors used in this study.** (a) Vector  
1216 map of pMKMM23 for the expression of miniTurbo-Myc-MpSYP12A. (b)  
1217 Vector map of pMKMM22 for the expression of miniTurbo-Myc-  
1218 MpSYP13B.

1219

1220 **Fig. S3 Evaluation of the fusion protein expression, biotin depletion**  
1221 **methods, and Myc-Trap Co-IP by immunoblotting.** (a) Selection of  
1222 transgenic lines expressing miniTurbo-Myc-MpSYP12A and miniTurbo-  
1223 Myc-MpSYP13B fusion-proteins. Immunoblot (IB) of cell extracts from 10-  
1224 day old thalli. MiniTurbo-Myc fusion proteins were detected by using an  
1225 anti-Myc antibody. Cell extract of wildtype Tak-1 (WT) was used as a  
1226 control. (b and c) Comparison of biotin depletion methods. Ten-day old  
1227 thalli of a transgenic line expressing miniTurbo-Myc-MpSYP13B and

1228 wildtype Tak-1 (WT) were treated with 700  $\mu$ M biotin solution for 24 hours.  
1229 Total protein was extracted (input) and free biotin was removed from the  
1230 samples by methanol:chloroform precipitation (IP\_1), PD-10 column  
1231 desalting (IP\_2), or Zeba spin column desalting (IP\_3) before pulldown of  
1232 biotinylated proteins using streptavidin-agarose beads. Streptavidin (SA)  
1233 Immunoblots (IB) of biotinylated proteins. **(b)** Biotinylated proteins in cell  
1234 extracts (input) and IP-eluates (IP-1, IP\_2, IP\_3) for the different biotin  
1235 depletion methods. **(c)** Biotinylated proteins in cell extract (input), the  
1236 supernatant of the streptavidin-agarose beads after affinity pulldown  
1237 (unbound\_1, unbound\_2, unbound\_3), and IP-eluates (IP\_1, IP\_2, IP\_3) for  
1238 the different biotin depletion methods. All depletion methods were tested in  
1239 duplicates. **(d)** Evaluation of Myc-Trap Co-IP by immunoblotting.  
1240 Immunoblot (IB) of cell extracts from 10-day old thalli. MiniTurbo-Myc  
1241 fusion proteins were detected by using an anti-Myc antibody in cell extracts  
1242 (input) and IP-eluates (IP) after affinity-purification using Myc-Trap beads.  
1243 Coomassie Brilliant Blue-stained (CBB) membranes are shown as loading  
1244 controls.

1245

1246 **Fig. S4 Biotin ligase activity in *M. polymorpha*.** Streptavidin (SA)  
1247 immunoblots (IB) of cell extracts from *M. polymorpha* transgenic lines  
1248 expressing miniTurbo-Myc-MpSYP12A (upper panels) and miniTurbo-  
1249 Myc-MpSYP13B (lower panels) that were **(a)** treated with 0–700  $\mu$ M biotin  
1250 solutions for 24 hours at RT or **(b)** treated with 700  $\mu$ M biotin solution for  
1251 0–6 hours at RT. Cell extracts of wildtype Tak-1 (WT) treated with 700  $\mu$ M  
1252 biotin solution for **(a)** 24 hours or **(b)** 6 hours were used as controls. Arrows  
1253 indicate the positions of the biotinylated miniTurbo-Myc-MpSYP12A and  
1254 miniTurbo-Myc-MpSYP13B fusion-proteins. Coomassie Brilliant Blue-  
1255 stained (CBB) membranes are shown as loading controls.

1256

1257 **Fig. S5 GO-term enrichment analysis.** GO-term enrichment analysis of (a)  
1258 4 hours PL MpSYP12A interactome, (b) 4 hours PL MpSYP13B  
1259 interactome, and (c) measured whole proteome. The top 20 overrepresented  
1260 GO-terms are shown.

1261

1262 **Fig. S6 Uncropped images of immunoblots used in figures.**

1263

# Figure 1

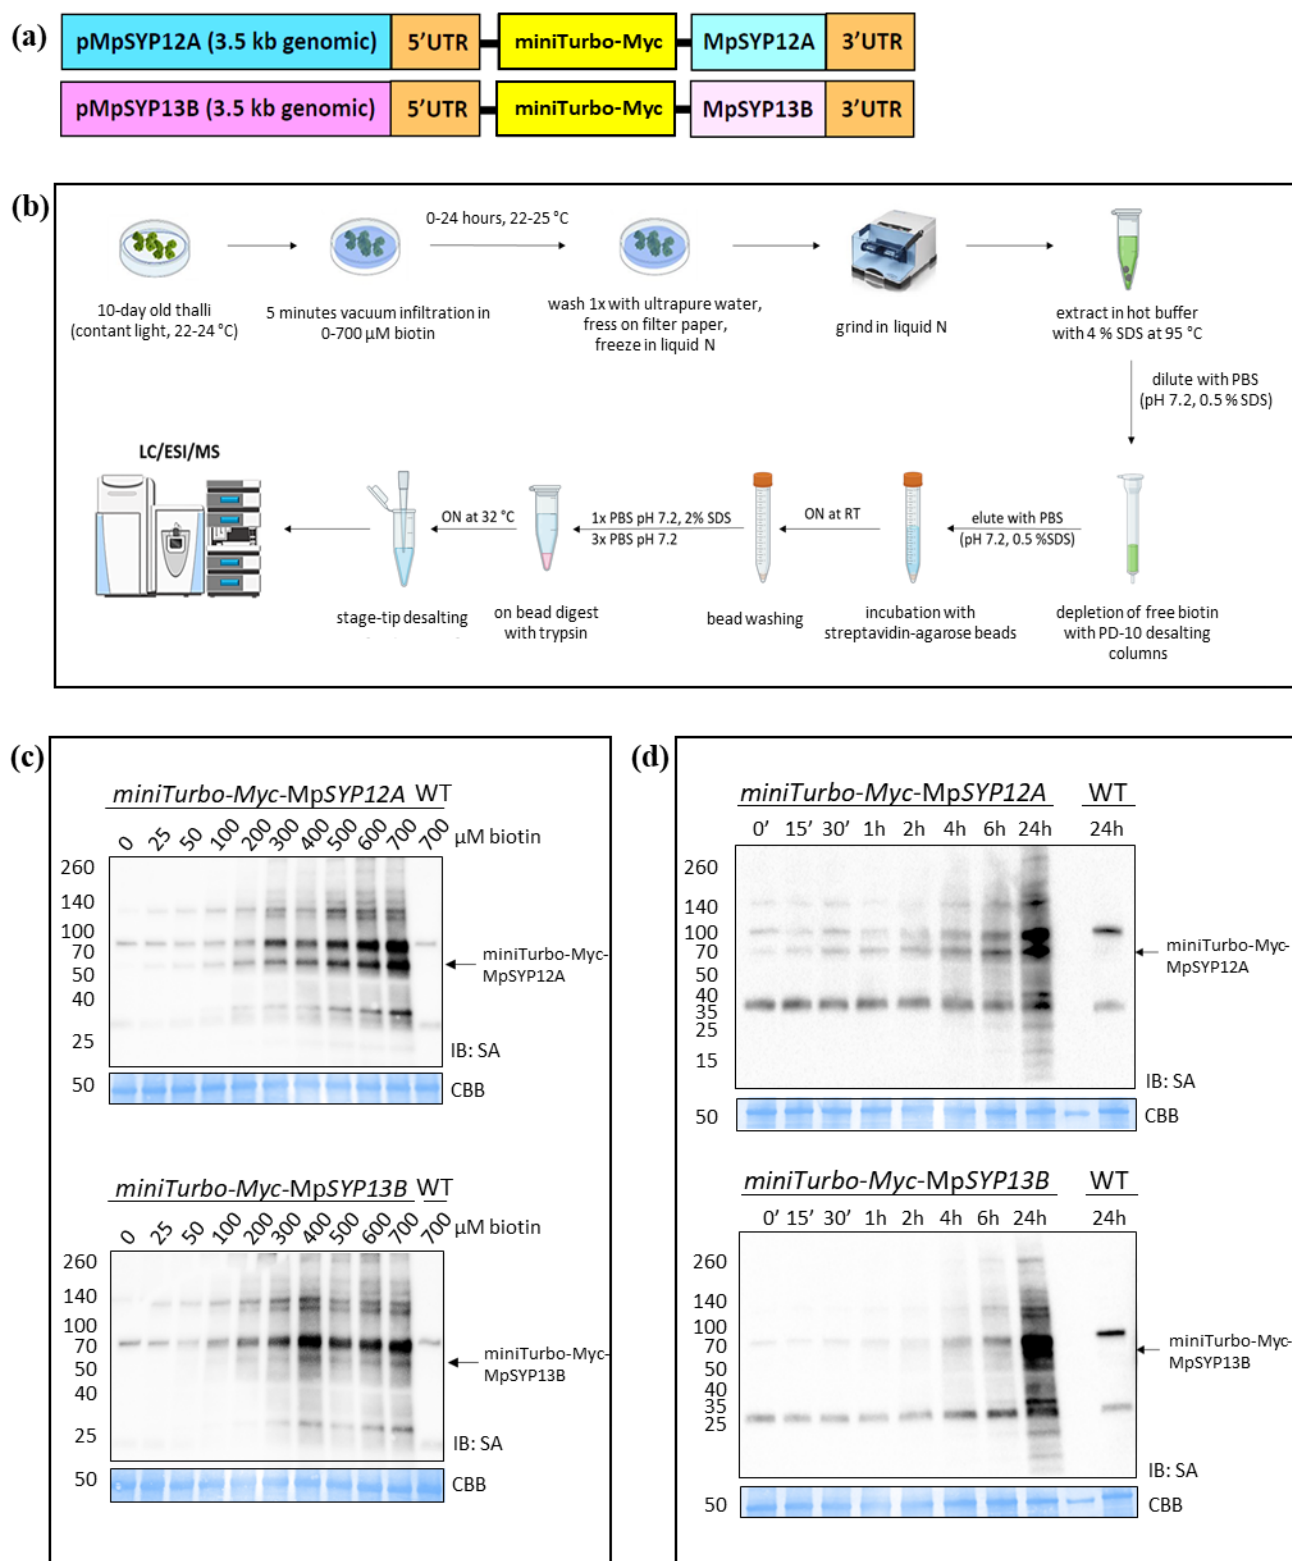

## Figure 2

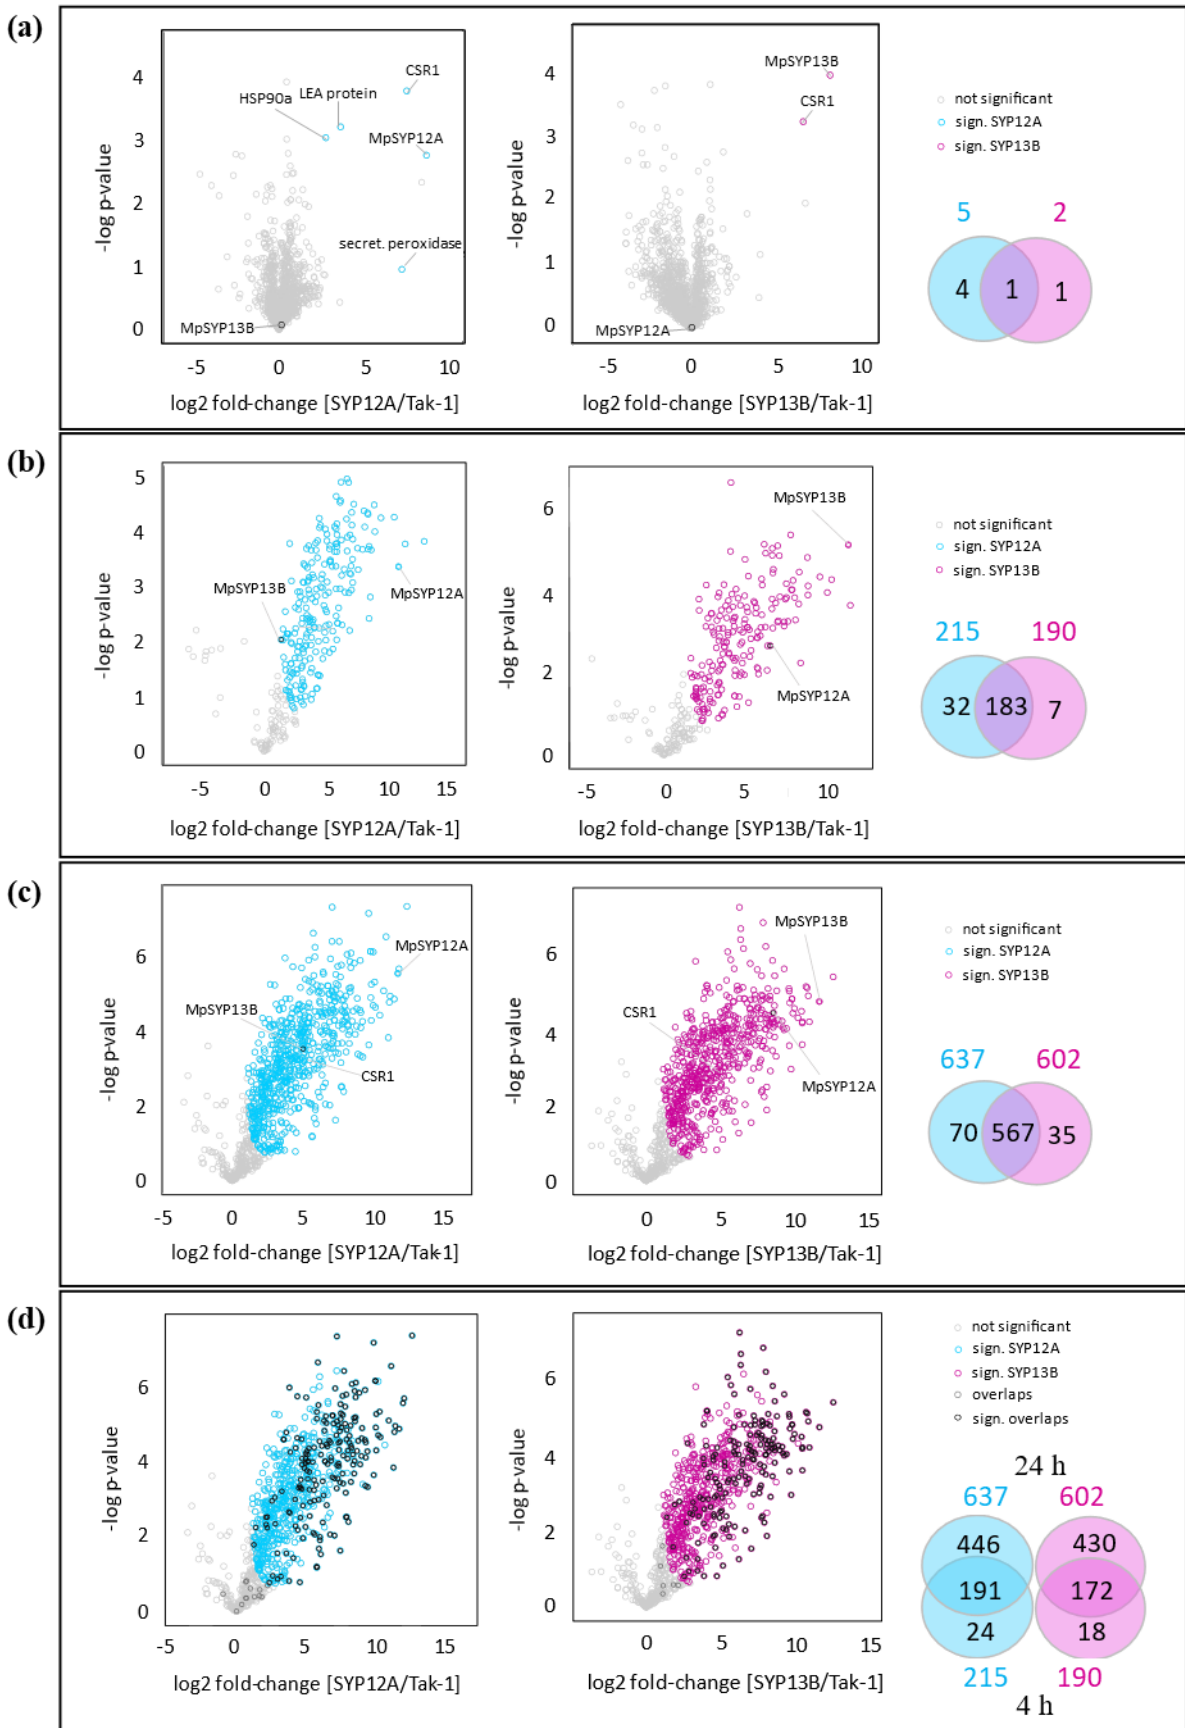



# Figure 3

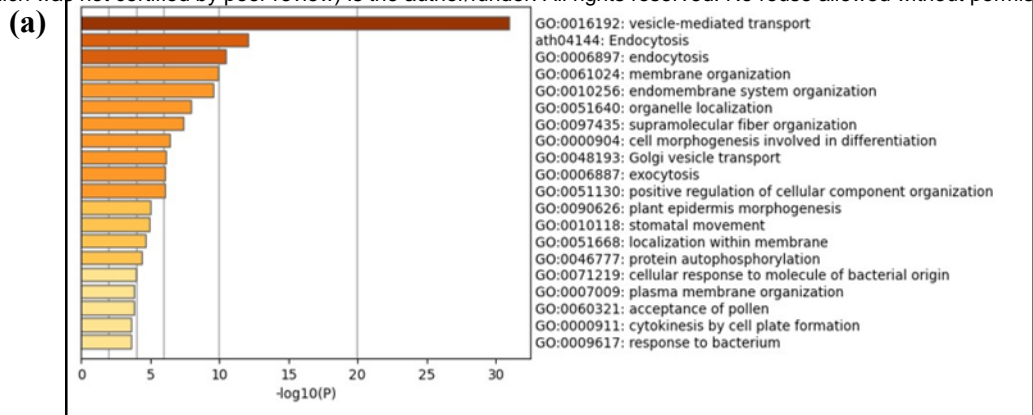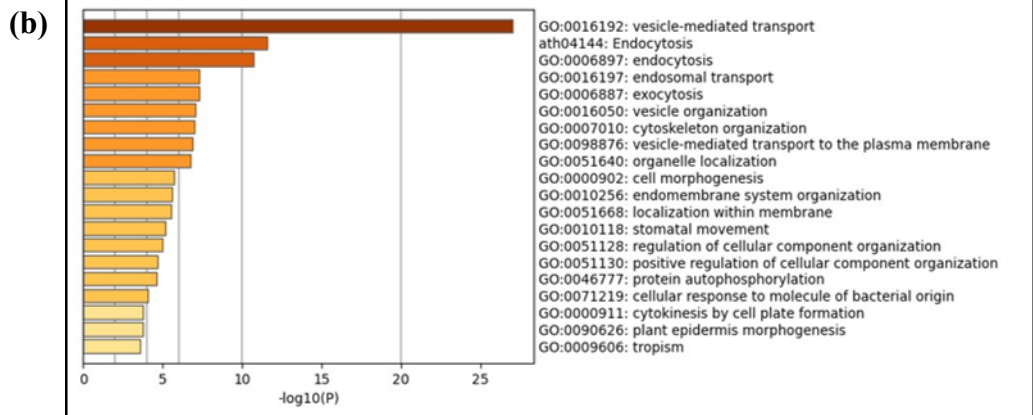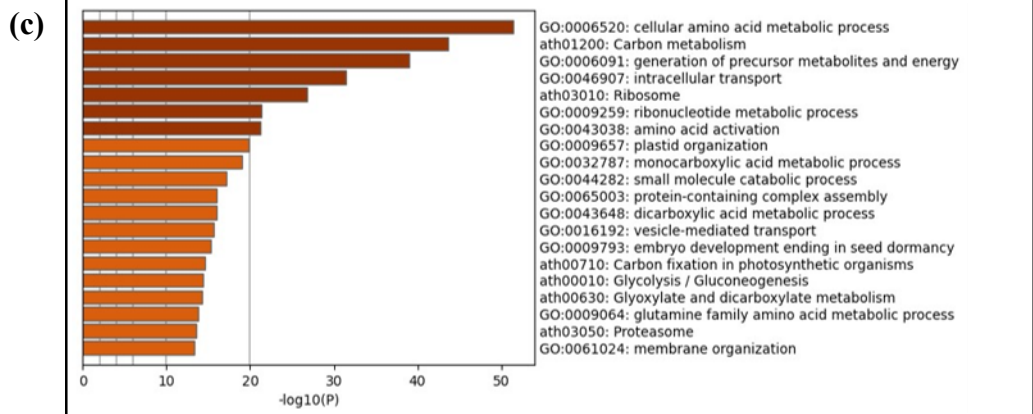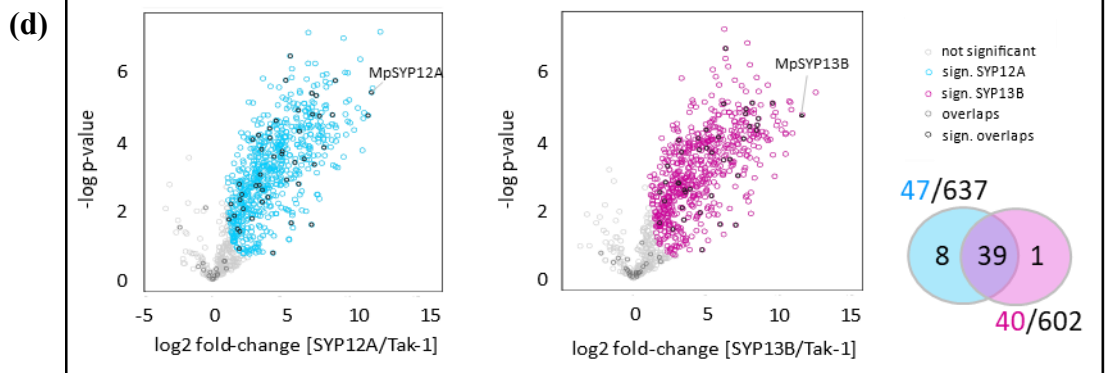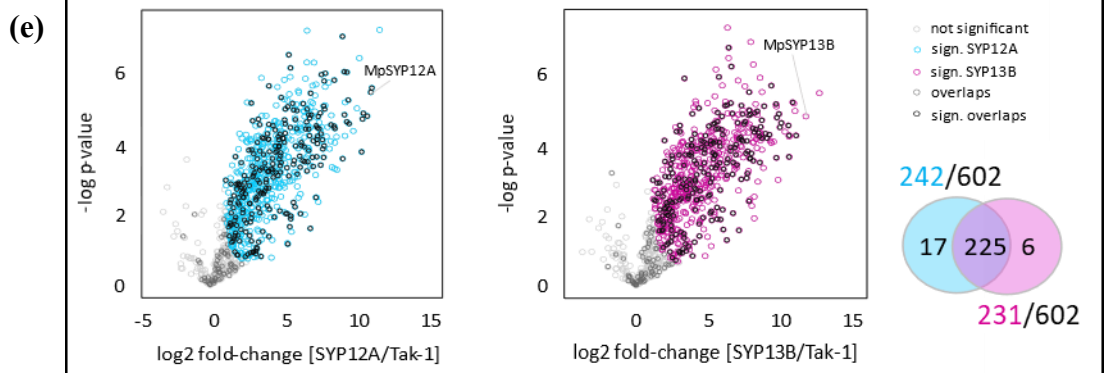

**Figure 4**

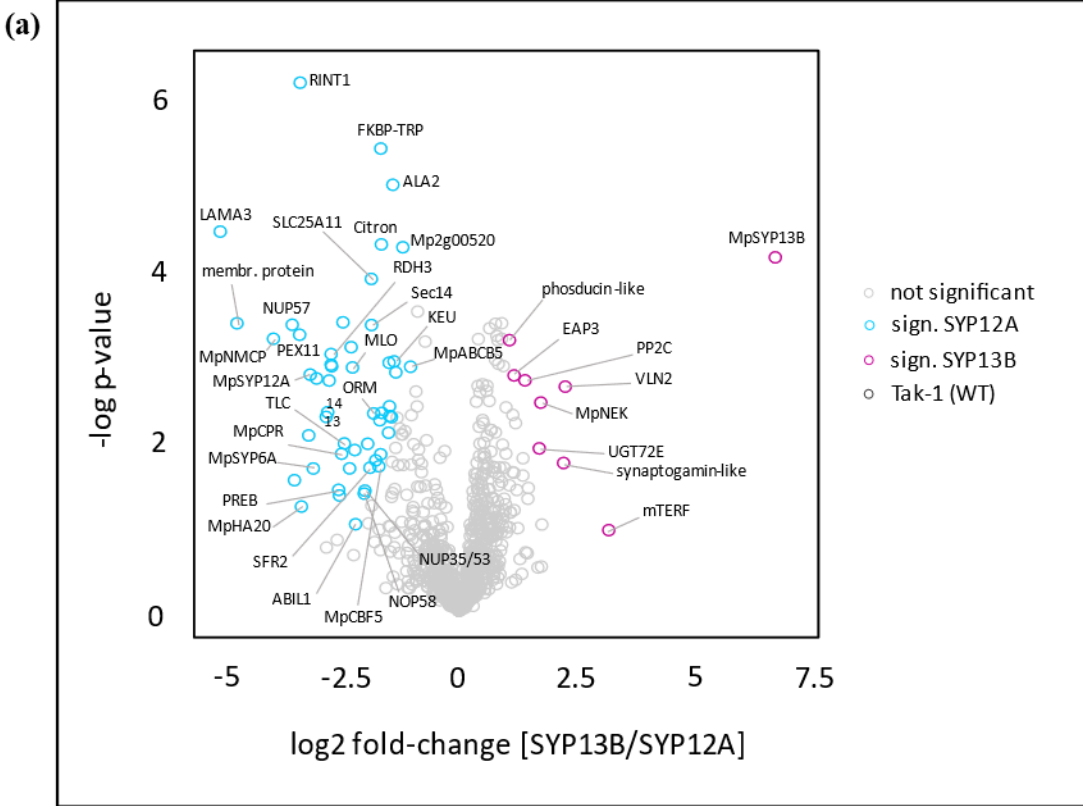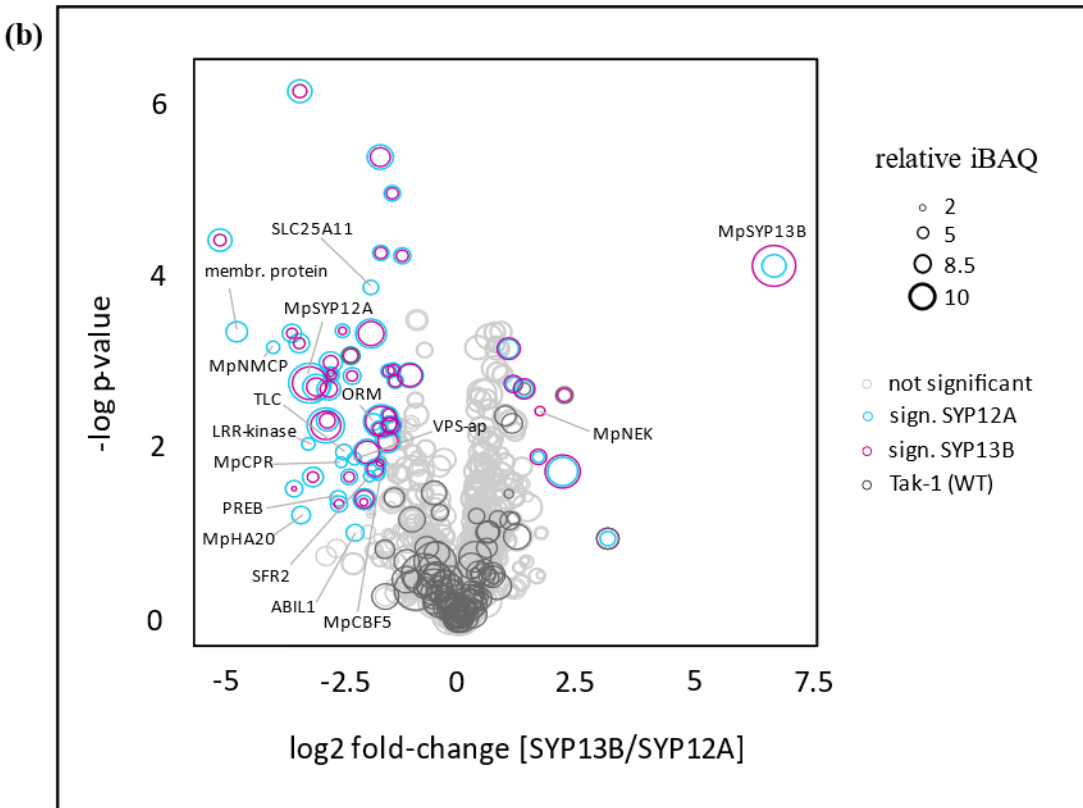

**Table 1**

| No. | MpGene ID | <i>A. thaliana</i><br>homolog<br>(AGI code) | Annotation        | Log2 fold-change<br>SYP13B/ SYP12A | -log<br>p-value | Exclusive |
|-----|-----------|---------------------------------------------|-------------------|------------------------------------|-----------------|-----------|
| 1   | Mp1g19980 | -                                           | LAMA3             | -5,05                              | 4,41            | no        |
| 2   | Mp2g10520 | AT4G31080                                   | membr. Protein    | -4,69                              | 3,34            | MpSYP12A  |
| 3   | Mp3g21160 | AT1G67230                                   | MpNMCP            | -3,92                              | 3,16            | MpSYP12A  |
| 4   | Mp3g05990 | AT3G10650                                   | NUP57             | -3,52                              | 3,32            | no        |
| 5   | Mp1g10960 | -                                           | Mp1g10960         | -3,48                              | 1,52            | no        |
| 6   | Mp1g28560 | AT1G47750                                   | PEX11             | -3,37                              | 3,21            | no        |
| 7   | Mp6g02820 | AT3G47700                                   | RINT1             | -3,36                              | 6,14            | no        |
| 8   | Mp3g12450 | AT4G30190                                   | MpHA20            | -3,33                              | 1,21            | MpSYP12A  |
| 9   | Mp2g17240 | AT5G01950                                   | LRR-kinase        | -3,18                              | 2,04            | MpSYP12A  |
| 10  | Mp6g00050 | AT1G61290                                   | MpSYP12A          | -3,14                              | 2,74            | no        |
| 11  | Mp3g18380 | AT1G28490                                   | MpSYP6A           | -3,08                              | 1,65            | no        |
| 12  | Mp1g08670 | AT1G73200                                   | TEX2              | -3,01                              | 2,70            | no        |
| 13  | Mp6g00330 | AT4G04910                                   | NSF               | -2,81                              | 2,25            | no        |
| 14  | Mp2g14450 | AT5G45420                                   | MpMYB3            | -2,77                              | 2,31            | no        |
| 15  | Mp7g04560 | AT3G55420                                   | AT3G55420-like    | -2,74                              | 2,68            | no        |
| 16  | Mp2g20600 | AT5G43360                                   | PHO84             | -2,70                              | 2,86            | no        |
| 17  | Mp1g14480 | AT5G45160                                   | RDH3/SEY1         | -2,70                              | 2,98            | no        |
| 18  | Mp3g07700 | AT5G62670                                   | MpHA11            | -2,69                              | 2,84            | no        |
| 19  | Mp7g14000 | AT3G52190                                   | PREB              | -2,54                              | 1,41            | MpSYP12A  |
| 20  | Mp7g10500 | AT1G20970                                   | AT1G20970-like    | -2,53                              | 1,34            | no        |
| 21  | Mp1g28850 | AT5G64930                                   | MpCPR             | -2,48                              | 1,82            | MpSYP12A  |
| 22  | Mp7g07570 | AT1G48090                                   | VPS-associated    | -2,45                              | 3,35            | no        |
| 23  | Mp2g19670 | AT1G21790                                   | TLC lipid-sens.   | -2,42                              | 1,94            | no        |
| 24  | Mp3g14570 | AT1G73020                                   | ANO10             | -2,31                              | 1,65            | no        |
| 25  | Mp1g21390 | AT3G18610                                   | NSR1              | -2,28                              | 3,06            | no        |
| 26  | Mp5g01540 | AT5G53760                                   | MLO               | -2,25                              | 2,83            | no        |
| 27  | Mp3g11440 | AT1G48090                                   | VPS-associated    | -2,20                              | 1,87            | MpSYP12A  |
| 28  | Mp3g23010 | AT2G46225                                   | ABIL1             | -2,19                              | 1,01            | MpSYP12A  |
| 29  | Mp2g00370 | AT3G05060                                   | NOP58             | -2,00                              | 1,36            | MpSYP12A  |
| 30  | Mp1g11950 | AT3G16310                                   | NUP35/53          | -1,99                              | 1,40            | no        |
| 31  | Mp7g06360 | AT3G11950                                   | TRAF zinc finger  | -1,93                              | 1,94            | no        |
| 32  | Mp2g17840 | AT3G06510                                   | SFR2              | -1,88                              | 1,66            | MpSYP12A  |
| 33  | Mp3g16790 | AT5G19760                                   | SLC25A11          | -1,85                              | 3,86            | MpSYP12A  |
| 34  | Mp4g16700 | AT1G30690                                   | SEC14-related     | -1,85                              | 3,32            | no        |
| 35  | Mp2g02640 | AT1G01230                                   | ORM               | -1,80                              | 2,29            | MpSYP12A  |
| 36  | Mp2g10340 | AT3G12490                                   | CYSB-like         | -1,76                              | 1,75            | no        |
| 37  | Mp4g12650 | AT3G57150                                   | MpCBF5            | -1,69                              | 1,68            | MpSYP12A  |
| 38  | Mp6g17400 | AT3G20500                                   | APC7              | -1,67                              | 2,21            | no        |
| 39  | Mp6g16270 | AT2G45540                                   | BEACH             | -1,65                              | 1,82            | no        |
| 40  | Mp8g00690 | AT5G21990                                   | FKBP-TRP          | -1,65                              | 5,37            | no        |
| 41  | Mp3g00870 | AT5G13560                                   | Citron            | -1,64                              | 4,26            | no        |
| 42  | Mp4g16720 | AT1G30690                                   | SEC14-related     | -1,63                              | 2,30            | no        |
| 43  | Mp5g13890 | AT2G39280                                   | Ypt-activating    | -1,49                              | 2,07            | no        |
| 44  | Mp8g06300 | AT5G01180                                   | PTR5              | -1,48                              | 2,88            | no        |
| 45  | Mp8g18220 | AT3G60860                                   | BIG               | -1,47                              | 2,38            | no        |
| 46  | Mp4g23500 | AT1G59820                                   | DRS2              | -1,46                              | 2,26            | no        |
| 47  | Mp3g01730 | AT1G28250                                   | AT1G28250-like    | -1,43                              | 2,25            | no        |
| 48  | Mp1g04630 | AT5G44240                                   | ALA2              | -1,40                              | 4,95            | no        |
| 49  | Mp6g07760 | AT1G12360                                   | KEU               | -1,37                              | 2,90            | no        |
| 50  | Mp5g23560 | AT3G62860                                   | Lysophospholipase | -1,33                              | 2,77            | no        |
| 51  | Mp2g00520 | -                                           | Mp2g00520         | -1,19                              | 4,22            | no        |
| 52  | Mp4g07450 | AT3G28860                                   | MpABCB5           | -1,02                              | 2,84            | no        |
| 53  | Mp6g13120 | AT5G14240                                   | phosducin-like    | 1,07                               | 3,14            | no        |
| 54  | Mp3g04380 | AT3G09030                                   | EAP3              | 1,17                               | 2,74            | no        |
| 55  | Mp2g17470 | AT1G68410                                   | PP2C              | 1,40                               | 2,68            | no        |
| 56  | Mp2g15040 | AT4G01070                                   | UGT72E            | 1,70                               | 1,89            | no        |
| 57  | Mp5g04500 | AT3G04810                                   | MpNEK             | 1,73                               | 2,42            | MpSYP13B  |
| 58  | Mp6g00440 | AT1G22610                                   | Synaptogamin-like | 2,21                               | 1,72            | no        |
| 59  | Mp7g09750 | AT2G41740                                   | VLN2              | 2,25                               | 2,61            | no        |
| 60  | Mp3g14990 | AT4G14605                                   | mTERF             | 3,17                               | 0,94            | no        |
| 61  | Mp2g19600 | AT3G03800                                   | MpSYP13B          | 6,69                               | 4,11            | no        |

# Figure S1

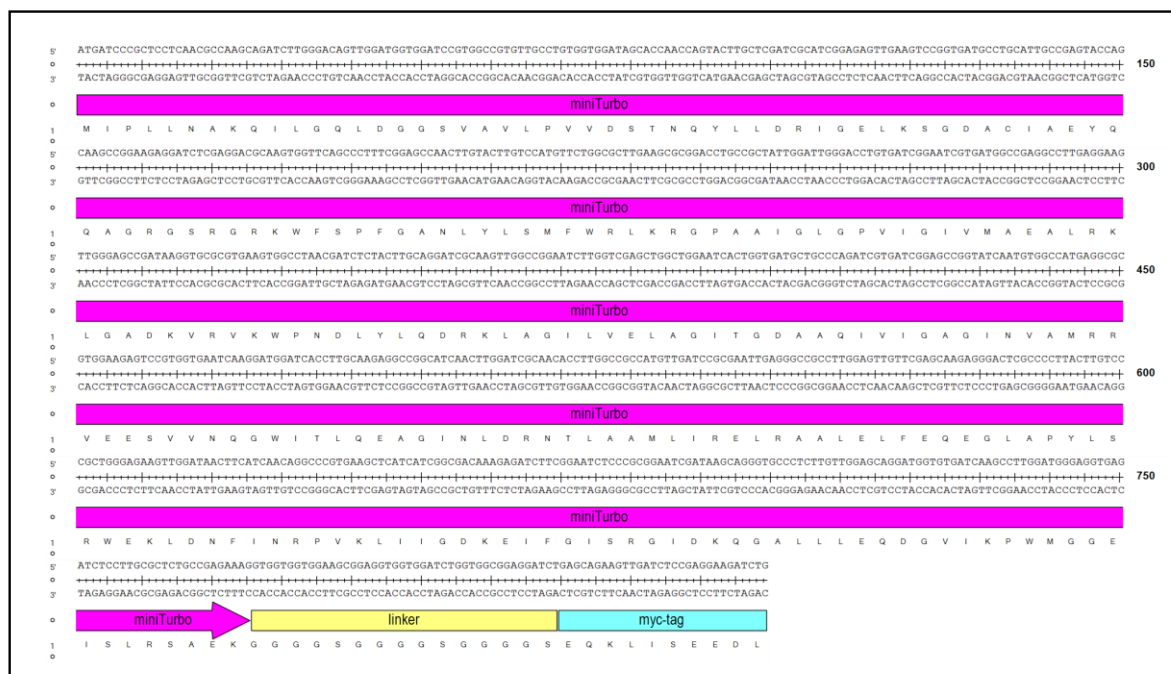

## Figure S2

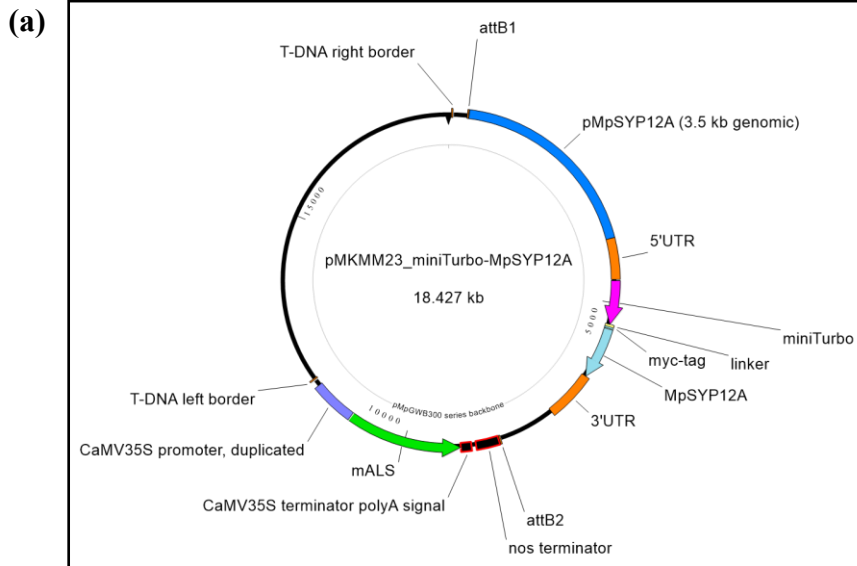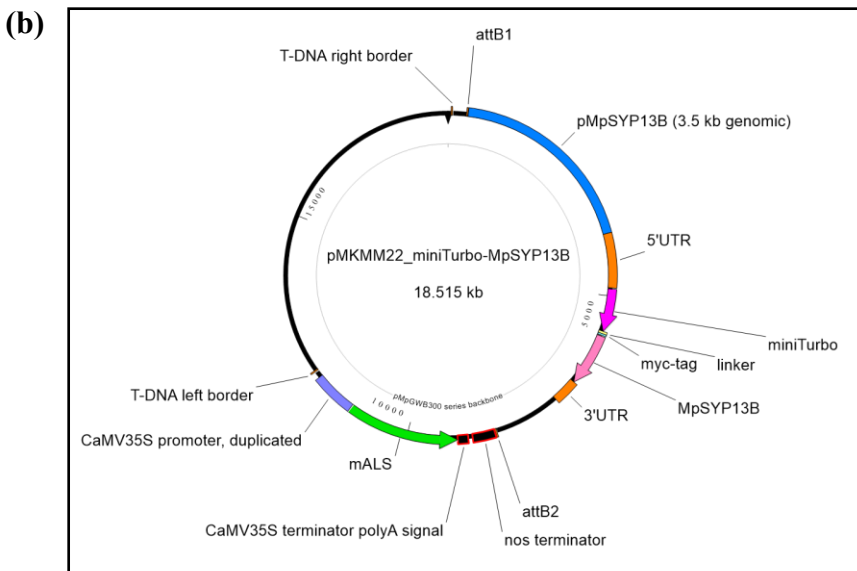

## Figure S3

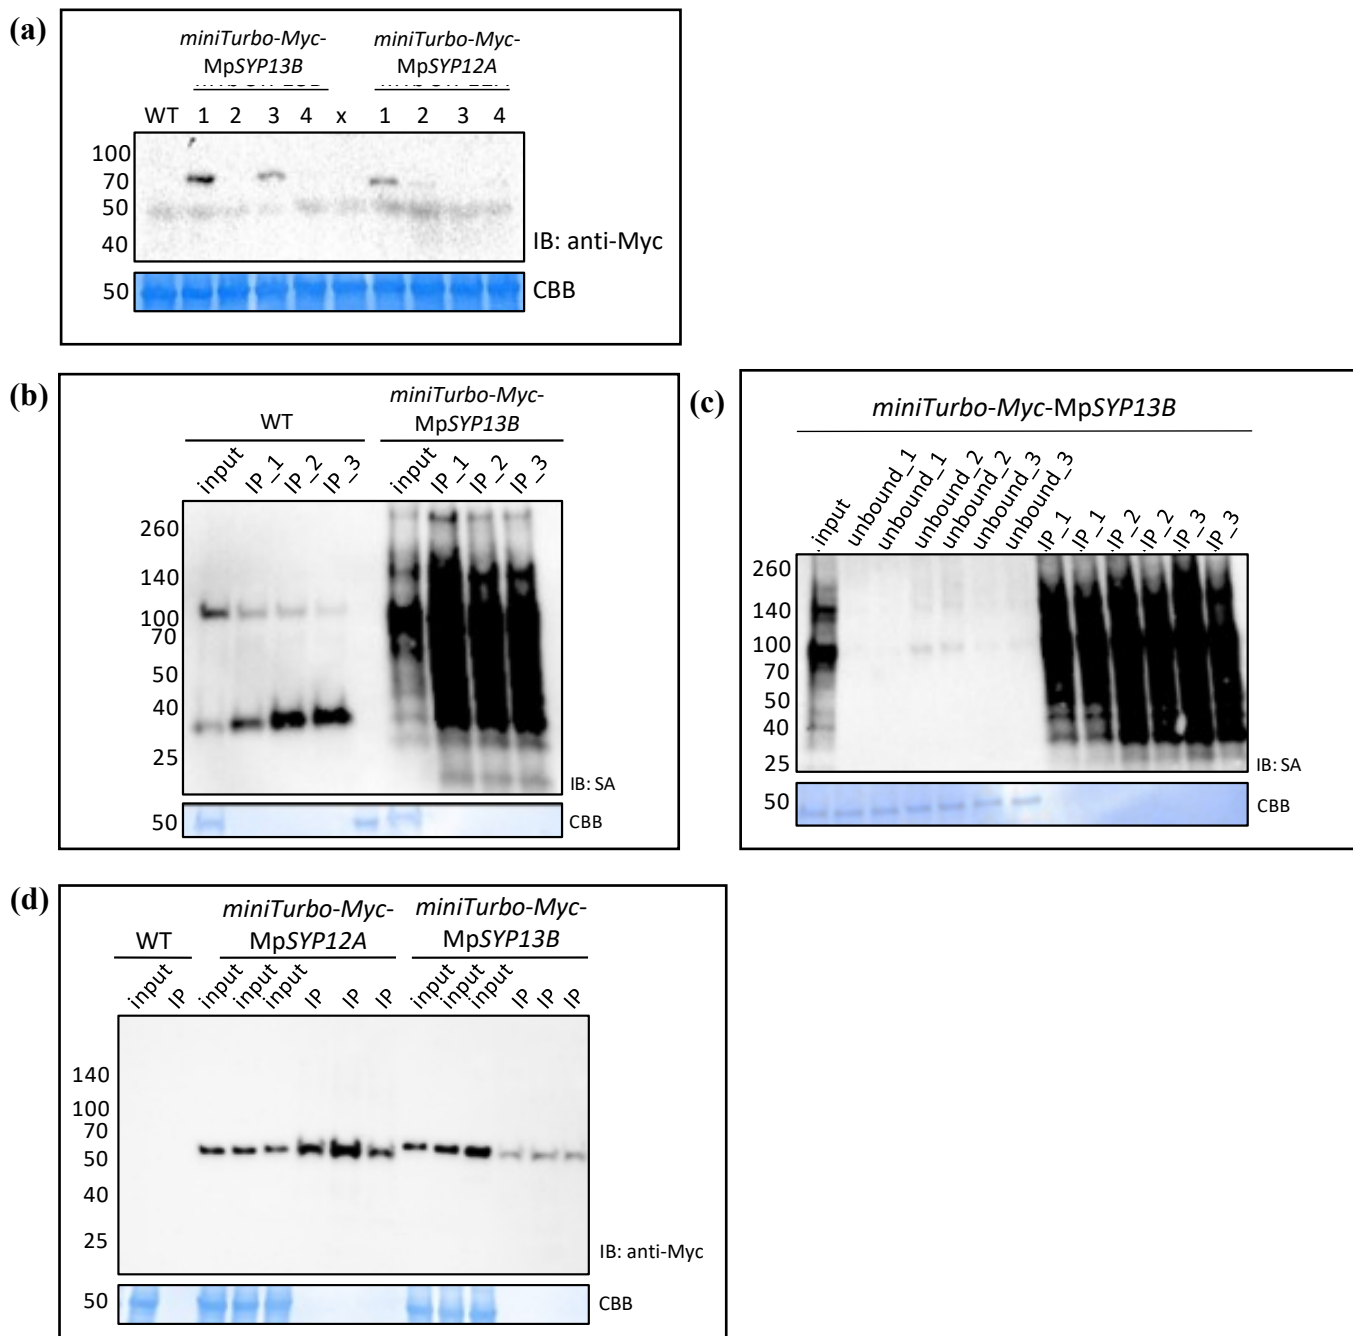

# Figure S4

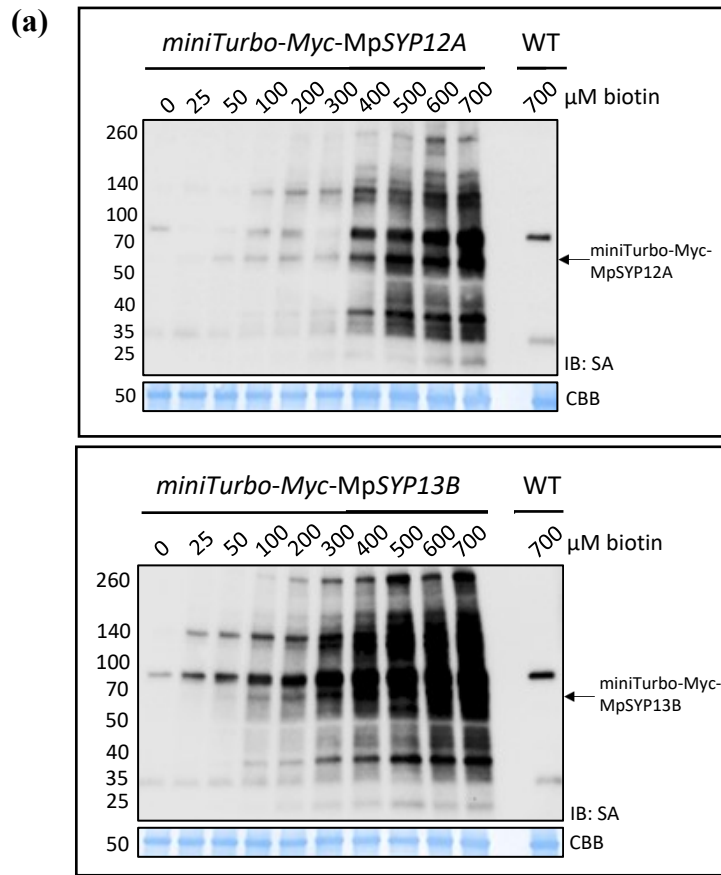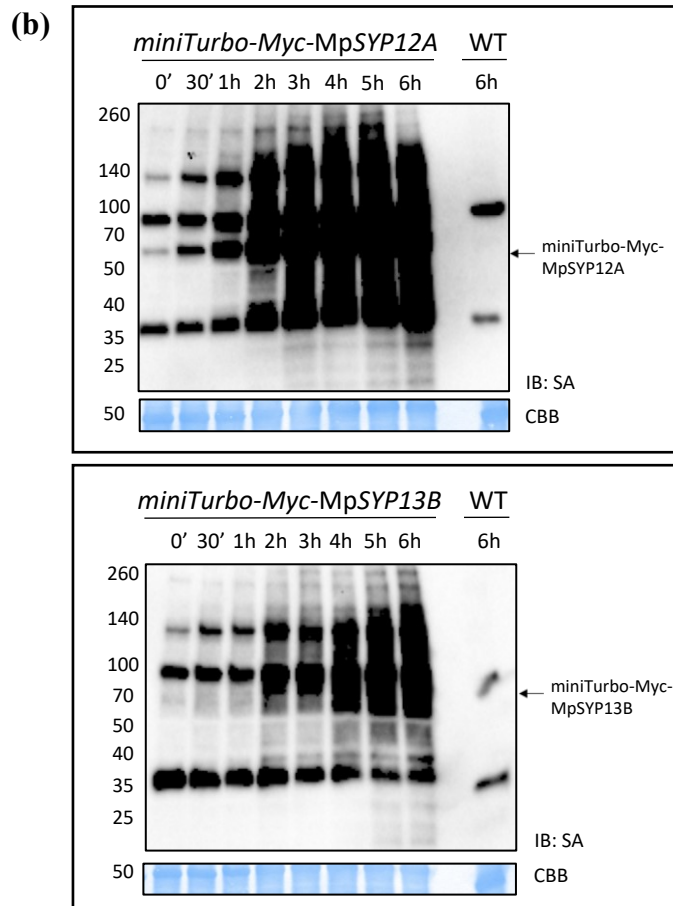

## Figure S5

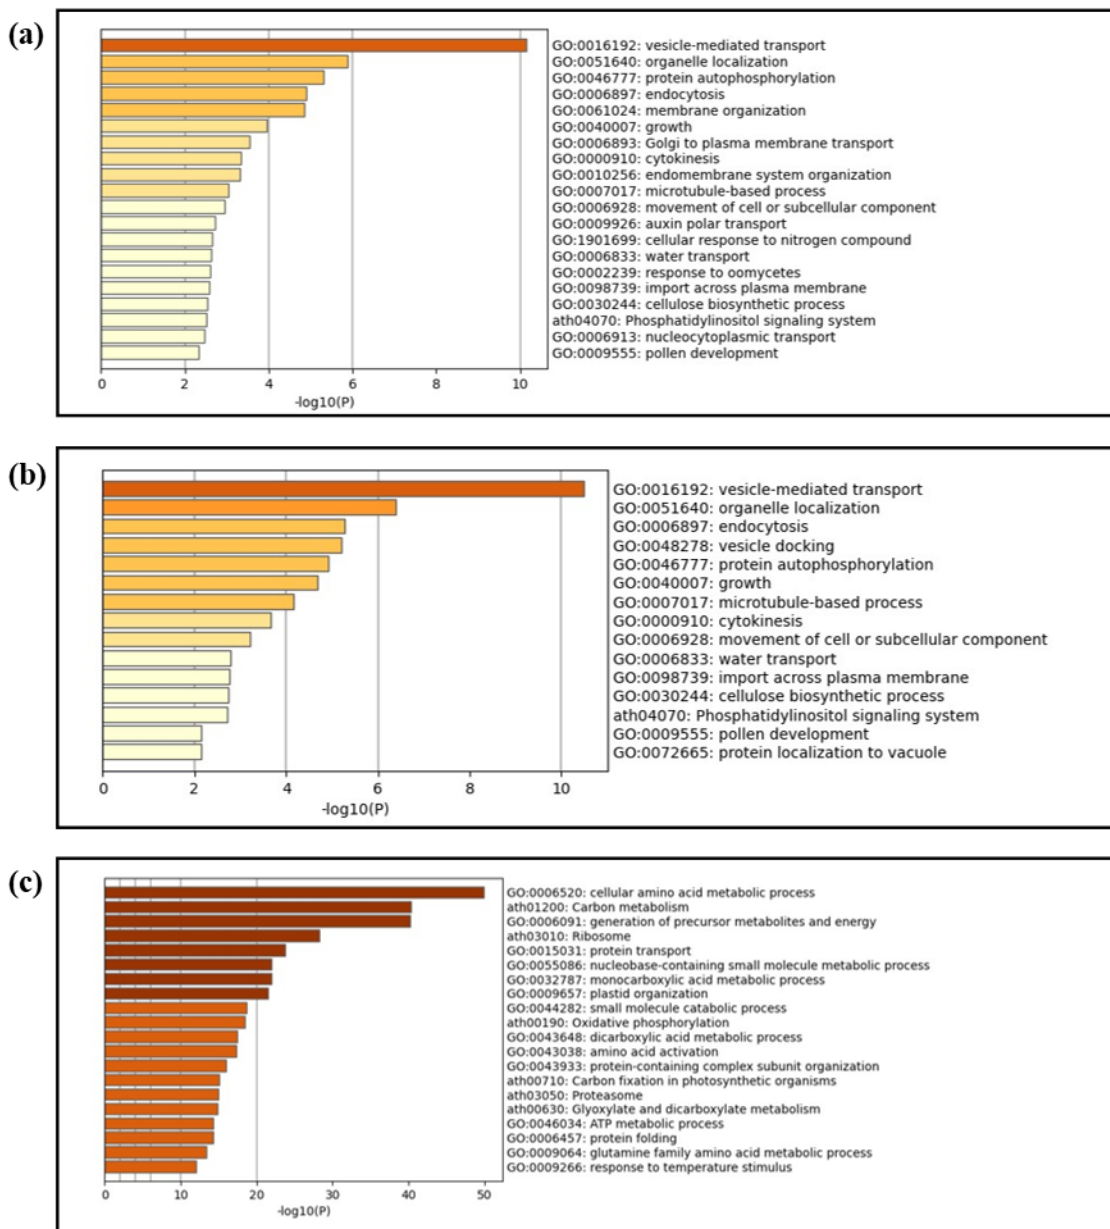



## Figure S6 – uncropped immunoblots

Figure 1c

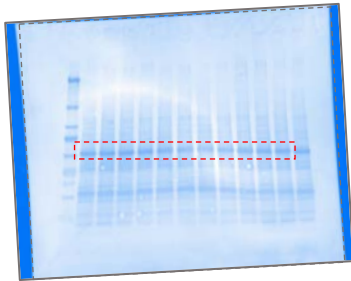

CBB stained membrane

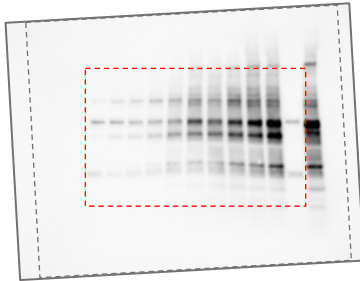

IB: streptavidin-HRP

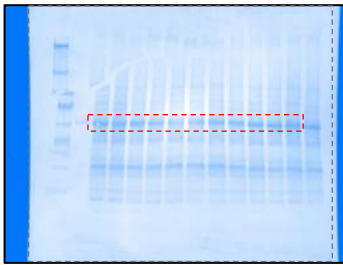

CBB stained membrane

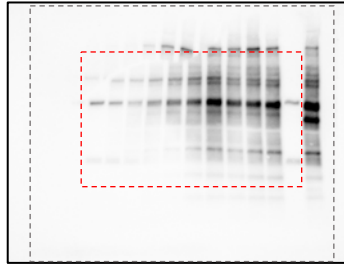

IB: streptavidin-HRP

Figure 1d

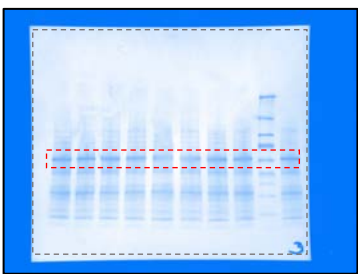

CBB stained membrane

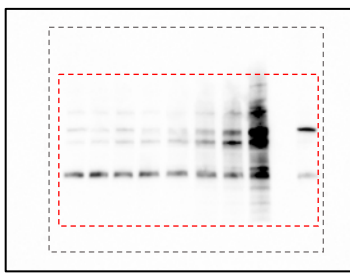

IB: streptavidin-HRP

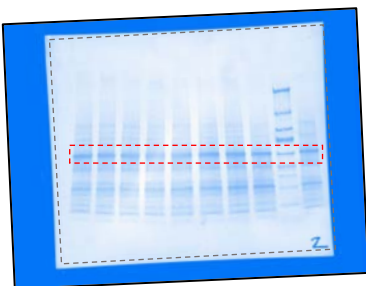

CBB stained membrane

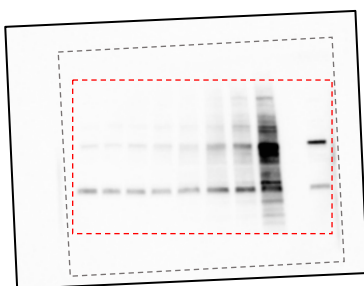

IB: streptavidin-HRP

**Figure S3a**

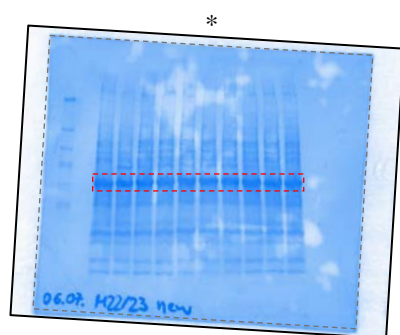

CBB stained membrane

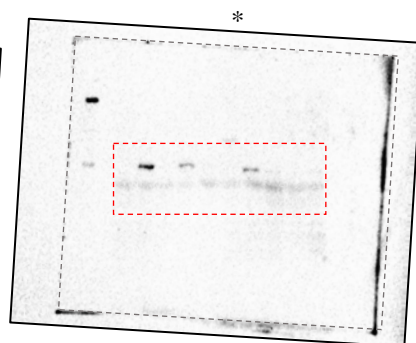

IB: anti-myc

\* *LYSM-mTb* = x

**Figure S3b**

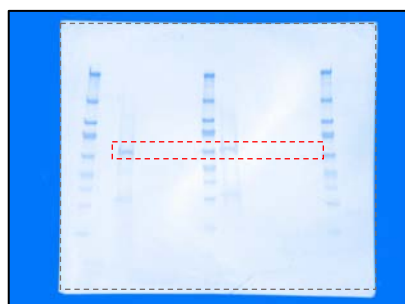

CBB stained membrane

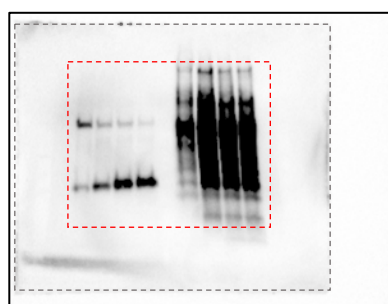

IB: streptavidin-HRP

**Figure S3c**

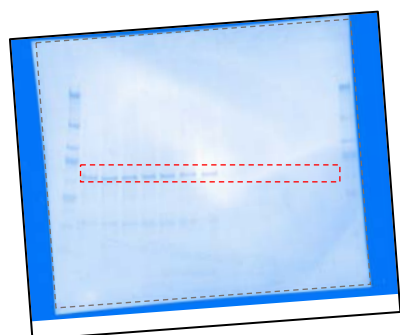

CBB stained membrane

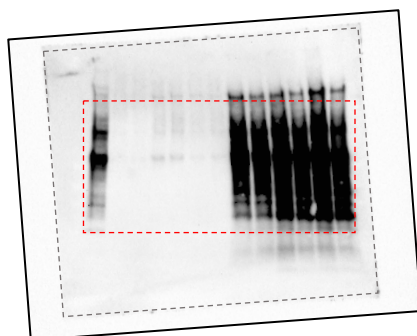

IB: streptavidin-HRP

**Figure S3d**

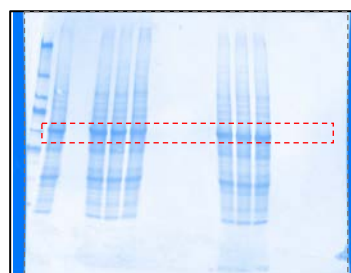

CBB stained membrane

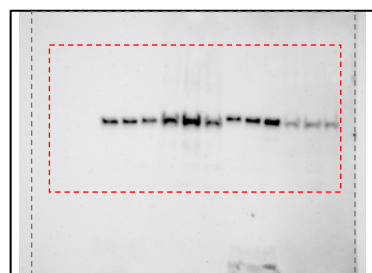

IB: anti-myc

### Figure S4a

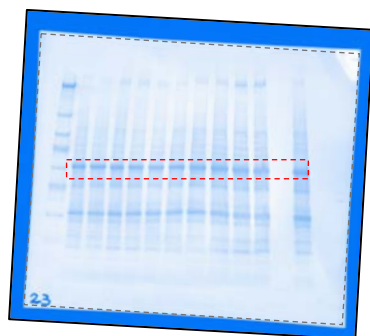

CBB stained membrane

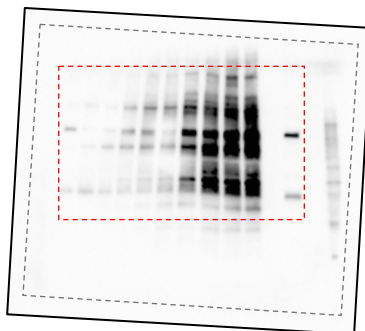

IB: streptavidin-HRP

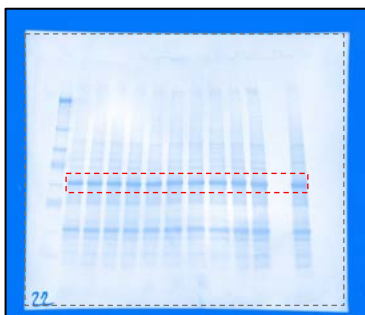

CBB stained membrane

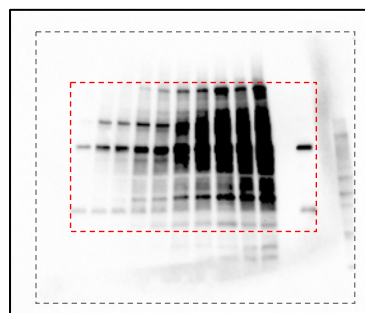

IB: streptavidin-HRP

### Figure S4b

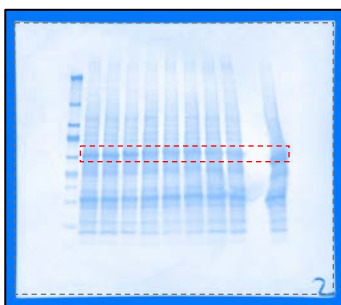

CBB stained membrane

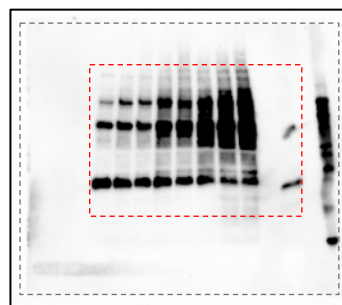

IB: streptavidin-HRP

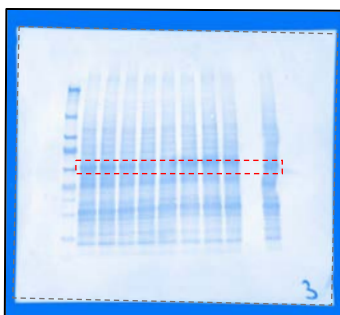

CBB stained membrane

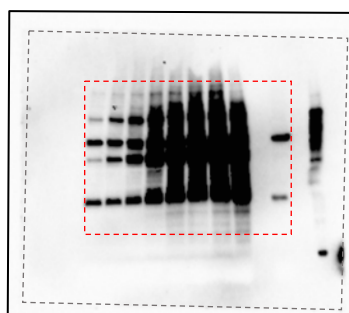

IB: streptavidin-HRP
